# Supplementary material
Source: PubMed Central journal article supplement (PMC3390854)
Supplement: 1201114109_Appendix.pdf [file 1201114109_Appendix.pdf]

**Supplementary Table 1**

| <b>EGFR-transfected Cell Line</b>  | <b>Plasmid 1 Tag – Amino-acid Substitution(s)</b> | <b>Plasmid 2 Tag – Amino-acid Substitution(s)</b> |
|------------------------------------|---------------------------------------------------|---------------------------------------------------|
| HA-WT                              | HA                                                | -                                                 |
| Flag-WT                            | Flag                                              | -                                                 |
| Flag-Lig                           | Flag-D355A                                        | -                                                 |
| HA-Kin                             | HA-D813N                                          | -                                                 |
| Flag-Lig/HA-Kin                    | Flag-D355A                                        | HA-D813N                                          |
| HA-Dim                             | HA-Y251A+R285S                                    | -                                                 |
| Flag-Dim+Lig                       | Flag-Y251A+R285S+D355A                            | -                                                 |
| HA-Dim+Kin                         | HA-Y251A+R285S+D813N                              | -                                                 |
| Flag-Dim+Lig/HA-Kin                | Flag-Y251A+R285S+D355A                            | HA-D813N                                          |
| Flag-Lig/HA-Dim+Kin                | Flag-D355A                                        | HA-Y251A+R285S+D813N                              |
| HA-Do                              | HA-V924R                                          | -                                                 |
| Flag-Lig+Kin/HA-Do                 | Flag-D355A+D813N                                  | HA-V924R                                          |
|                                    |                                                   |                                                   |
| <b>ErbB4-transfected Cell Line</b> |                                                   |                                                   |
| HA-WT                              | HA                                                | -                                                 |
| Flag-WT                            | Flag                                              | -                                                 |
| HA-Lig                             | HA-D351R                                          | -                                                 |
| Flag-Kin                           | Flag-D818N                                        | -                                                 |
| Ha-Lig/Flag-Kin                    | HA-D351R                                          | Flag-D818N                                        |
| HA-Dim                             | HA-F248A+R281S                                    | -                                                 |
| HA-Dim+Lig                         | HA-F248A+R281S+D351R                              | -                                                 |
| Flag-Dim+Kin                       | Flag-F248A+R281S+D818N                            | -                                                 |
| HA-Dim+Lig /Flag-Kin               | HA-F248A+R281S+D351R                              | Flag-D818N                                        |
| Flag-Dim+Kin/HA-Lig                | Flag-F248A+R281S+D818N                            | HA-D351R                                          |
| Flag-Do                            | Flag-V929R                                        | -                                                 |
| HA-Lig+Kin/Flag-Do                 | HA-D351R+D818N                                    | Flag-V929R                                        |

Supplementary Table 2

| <i>Cell Line</i>   | EGF Receptors per cell |
|--------------------|------------------------|
| <i>WT HA</i>       | 130,000                |
| <i>WT Flag</i>     | 128,000                |
| <i>Lig-</i>        | 60,000                 |
| <i>Kin-</i>        | 53,000                 |
| <i>Kin- + Lig-</i> | 87,000                 |
| <i>Do-</i>         | 179,000                |
| <i>Do- + K-:L-</i> | 72,000                 |
| <i>A431</i>        | 1,900,000              |

**Supplementary Table 3**

RMSD of Ca

| Protein | HER4 A | HER4 B | HER4 C | HER4 D | HER4 E | HER4 F | Ogiso A | Ogiso B | Garr A | Garr B | DER C |
|---------|--------|--------|--------|--------|--------|--------|---------|---------|--------|--------|-------|
| HER4 A  | *      | 0.283  | 0.273  | 0.321  | 0.421  | 0.240  | 1.15    | 1.13    | 1.90   | 1.37   | 1.44  |
| HER4 B  | 494    | *      | 0.371  | 0.220  | 0.472  | 0.231  | 1.24    | 1.15    | 1.89   | 1.34   | 1.40  |
| HER4 C  | 494    | 494    | *      | 0.348  | 0.438  | 0.367  | 1.21    | 1.18    | 1.89   | 1.32   | 1.41  |
| HER4 D  | 494    | 494    | 494    | *      | 0.525  | 0.203  | 1.20    | 1.17    | 1.94   | 1.39   | 1.40  |
| HER4 E  | 494    | 493    | 494    | 493    | *      | 0.496  | 1.18    | 1.26    | 1.74   | 1.29   | 1.55  |
| HER4 F  | 494    | 494    | 494    | 493    | 494    | *      | 1.16    | 1.13    | 1.90   | 1.37   | 1.42  |
| Ogiso A | 485    | 483    | 483    | 480    | 478    | 481    | *       | 0.497   | 1.61   | 1.06   | 1.66  |
| Ogiso B | 483    | 481    | 483    | 480    | 483    | 481    | 497     | *       | 1.707  | 1.05   | 1.58  |
| Garr A  | 465    | 463    | 461    | 462    | 471    | 462    | 484     | 485     | *      | 1.36   | 2.35  |
| Garr B  | 487    | 484    | 486    | 485    | 485    | 486    | 496     | 495     | 488    | *      | 1.70  |
| DER C   | 459    | 461    | 459    | 459    | 459    | 459    | 452     | 453     | 431    | 444    | *     |

Number of matched Residues

## Supplemental Figure Legends

Figure S1. Anti-EGFR pY1068 Western blots of EGFR immunoprecipitated from EGFR-transfected cell lines. Cell lines and labeling as described for Figure 1B.

Figure S2. Antiphosphotyrosine and anti-ErbB Western blots of immunoprecipitated full-length EGFR (top) and ErbB4 (bottom) tagged and bearing the same mutations as in Figure 1 except that a dimerization-arm (Di<sup>-</sup>) mutation has been added as a double mutation with the kinase-deficient (Di<sup>-</sup>:Kin<sup>-</sup>) and ligand-targeting (Di<sup>-</sup>:Lig<sup>-</sup>) mutations. Bar graphs represent quantitation of bands from at least 3 independent experiments. The dimerization arm mutation of EGFR failed to eliminate ligand-driven activation completely, and the residual activation in the Di<sup>-</sup>:Lig<sup>-</sup> plus Kin<sup>-</sup> transfected cells cannot be interpreted as independent of dimerization arm-mediated interactions in this case.

Figure S3. Anti-EGFR Western blots of lysates from known numbers of the EGFR-transfected cells used in cell-based assays as well as A431 cells. Cell lines are labeled as in Figure 1. Known amounts of purified, truncated EGFR were loaded as standards (right 5 lanes).

Figure S4. Orthogonal views of worm diagrams of all structures of EGFR/ErbB ectodomains with high-affinity ligand bound following superposition of domains I, II, and III are shown. Superposed ErbBs include the six independent sErbB4:Nrg1 $\beta$  subunits reported here, the re-refined EGFR:EGF subunits (1), the tEGFR:TGF $\alpha$  subunits (2), and the high-affinity *Drosophila* EGFR:Spitz subunit (3).

Figure S5. Alignment of Domain III/IV regions of EGFR. Orthogonal view of worm diagrams of domains III and IV of EGFR from both subunits of the EGFR:EGF complex (1), a low-pH tethered form of EGFR (4), and EGFR from a complex of EGFR and the Cetuximab Fab (5). Only domain III (yellow) was used in the superposition, but the positions of domain IV (red) are very similar.

Figure S6. Schematic diagram of ErbB dimer states. An inactive “preformed” dimer of EGFR, whose conformation is not known and may or may not adopt a tethered state, is able to bind a single ligand to form an active, asymmetric singly-ligated receptor dimer (middle panel). This asymmetric dimer has a liganded subunit with a bent domain II conformation and an unliganded subunit with a straight conformation shown in lighter hues. ErbB2/HER2 is ideally configured to serve as the unliganded partner in this dimer. The right panel shows a symmetric, doubly-ligated receptor dimer.

Figure S7. Glutamine 194 participates differently in tEGFR:TGF $\alpha$  vs. sErbB4:Nrg1 $\beta$  and EGFR:EGF dimers. Worm diagrams of the “top” view of EGFR:ligand dimers, similar to the view in the bottom panels of Figure 4, in which one EGFR subunit is colored yellow and the other blue. The tEGFR:TGF $\alpha$  dimer (2) is on the left and the EGFR:EGF dimer is on the right (1, 6). The side chain of Q194 from each subunit is shown in red spheres.

Figure S8. The position of domain IV region in the asymmetric *Drosophila* EGFR:Spitz dimer. The positions of the C-terminal regions of domain IV were modeled on each subunit of the asymmetric *Drosophila* EGFR:Spitz dimer by superimposing domain IV from the EGFR:EGF dimer (1) on the homologous regions of domain IV present in the *Drosophila* EGFR:Spitz dimer (3). The *Drosophila* EGFR subunit with a high-affinity Spitz bound is colored yellow, the

subunit with a low-affinity Spitz bound is blue, Spitz is magenta, and the modeled domain IV positions are light blue. The distance between the C-termini of the modeled domain IV regions is 12.8 Å, which compares to 8.0 Å in the EGFR:EGF dimer (1).

## References

1. Lu C, *et al.* (2010) Structural evidence for loose linkage between ligand binding and kinase activation in the epidermal growth factor receptor. *Mol Cell Biol* 30(22):5432-5443.
2. Garrett TP, *et al.* (2002) Crystal structure of a truncated epidermal growth factor receptor extracellular domain bound to transforming growth factor alpha. *Cell* 110(6):763-773.
3. Alvarado D, Klein DE, & Lemmon MA (2010) Structural basis for negative cooperativity in growth factor binding to an EGF receptor. *Cell* 142(4):568-579.
4. Ferguson KM, *et al.* (2003) EGF activates its receptor by removing interactions that autoinhibit ectodomain dimerization. *Mol Cell* 11(2):507-517.
5. Li S, *et al.* (2005) Structural basis for inhibition of the epidermal growth factor receptor by cetuximab. *Cancer Cell* 7(4):301-311.
6. Ogiso H, *et al.* (2002) Crystal structure of the complex of human epidermal growth factor and receptor extracellular domains. *Cell* 110(6):775-787.

Figure S1

**A**

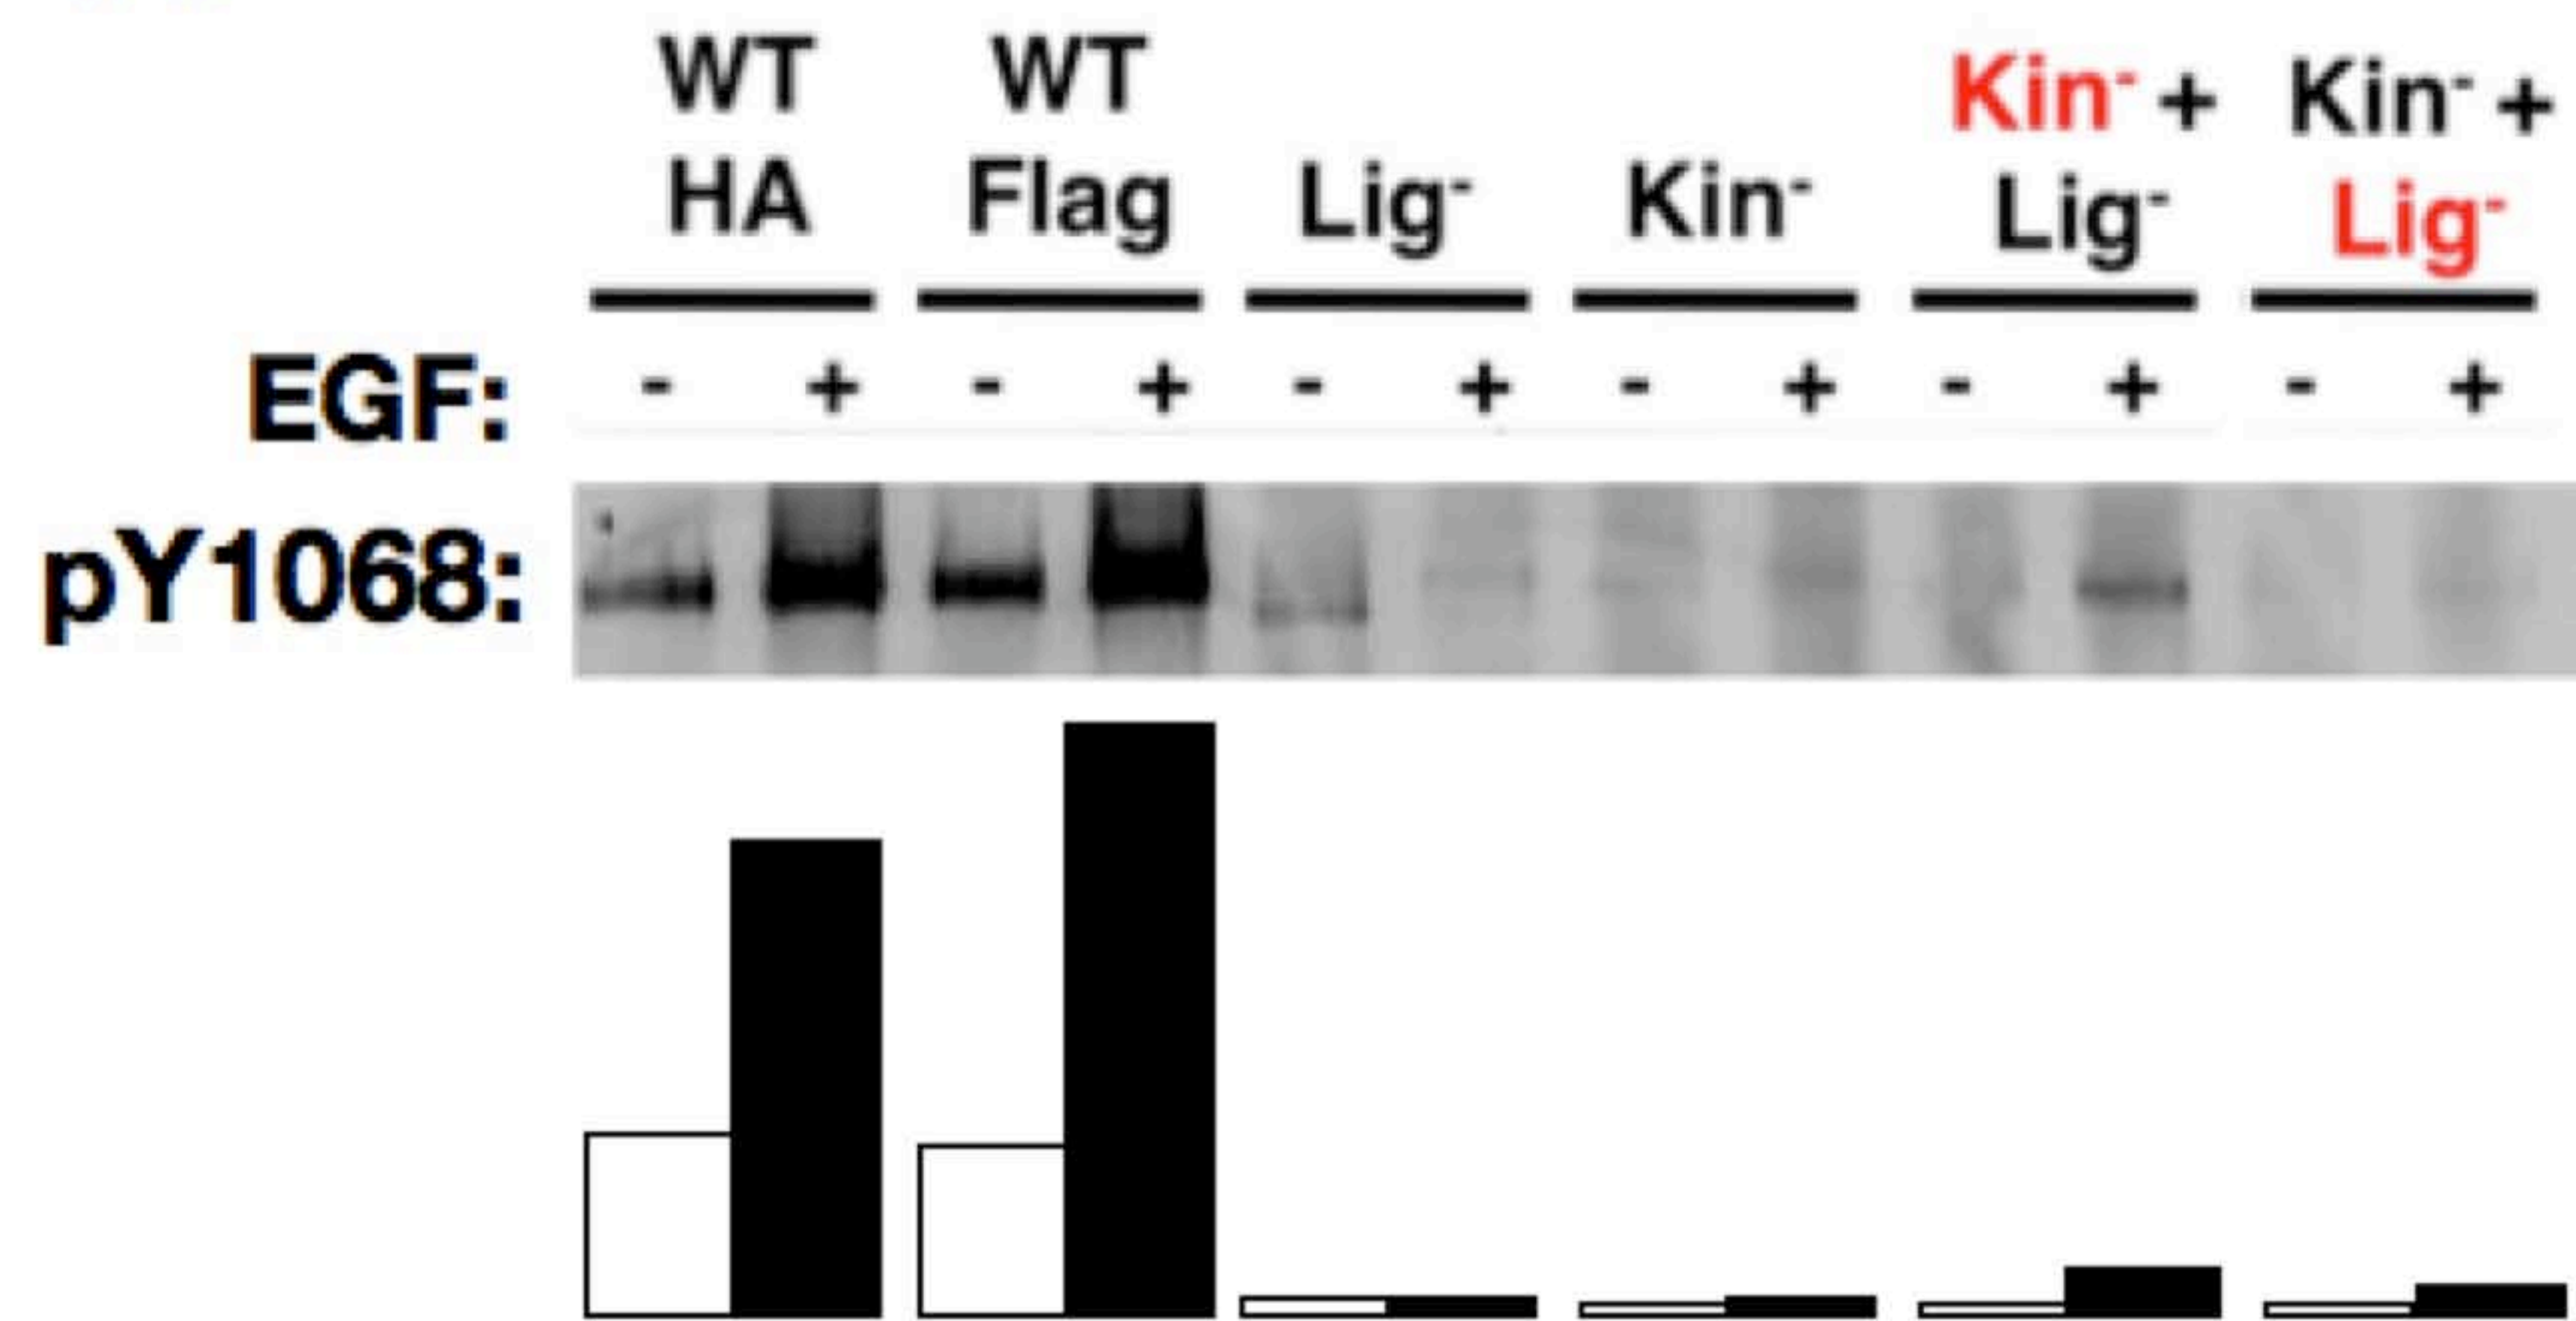

**B**

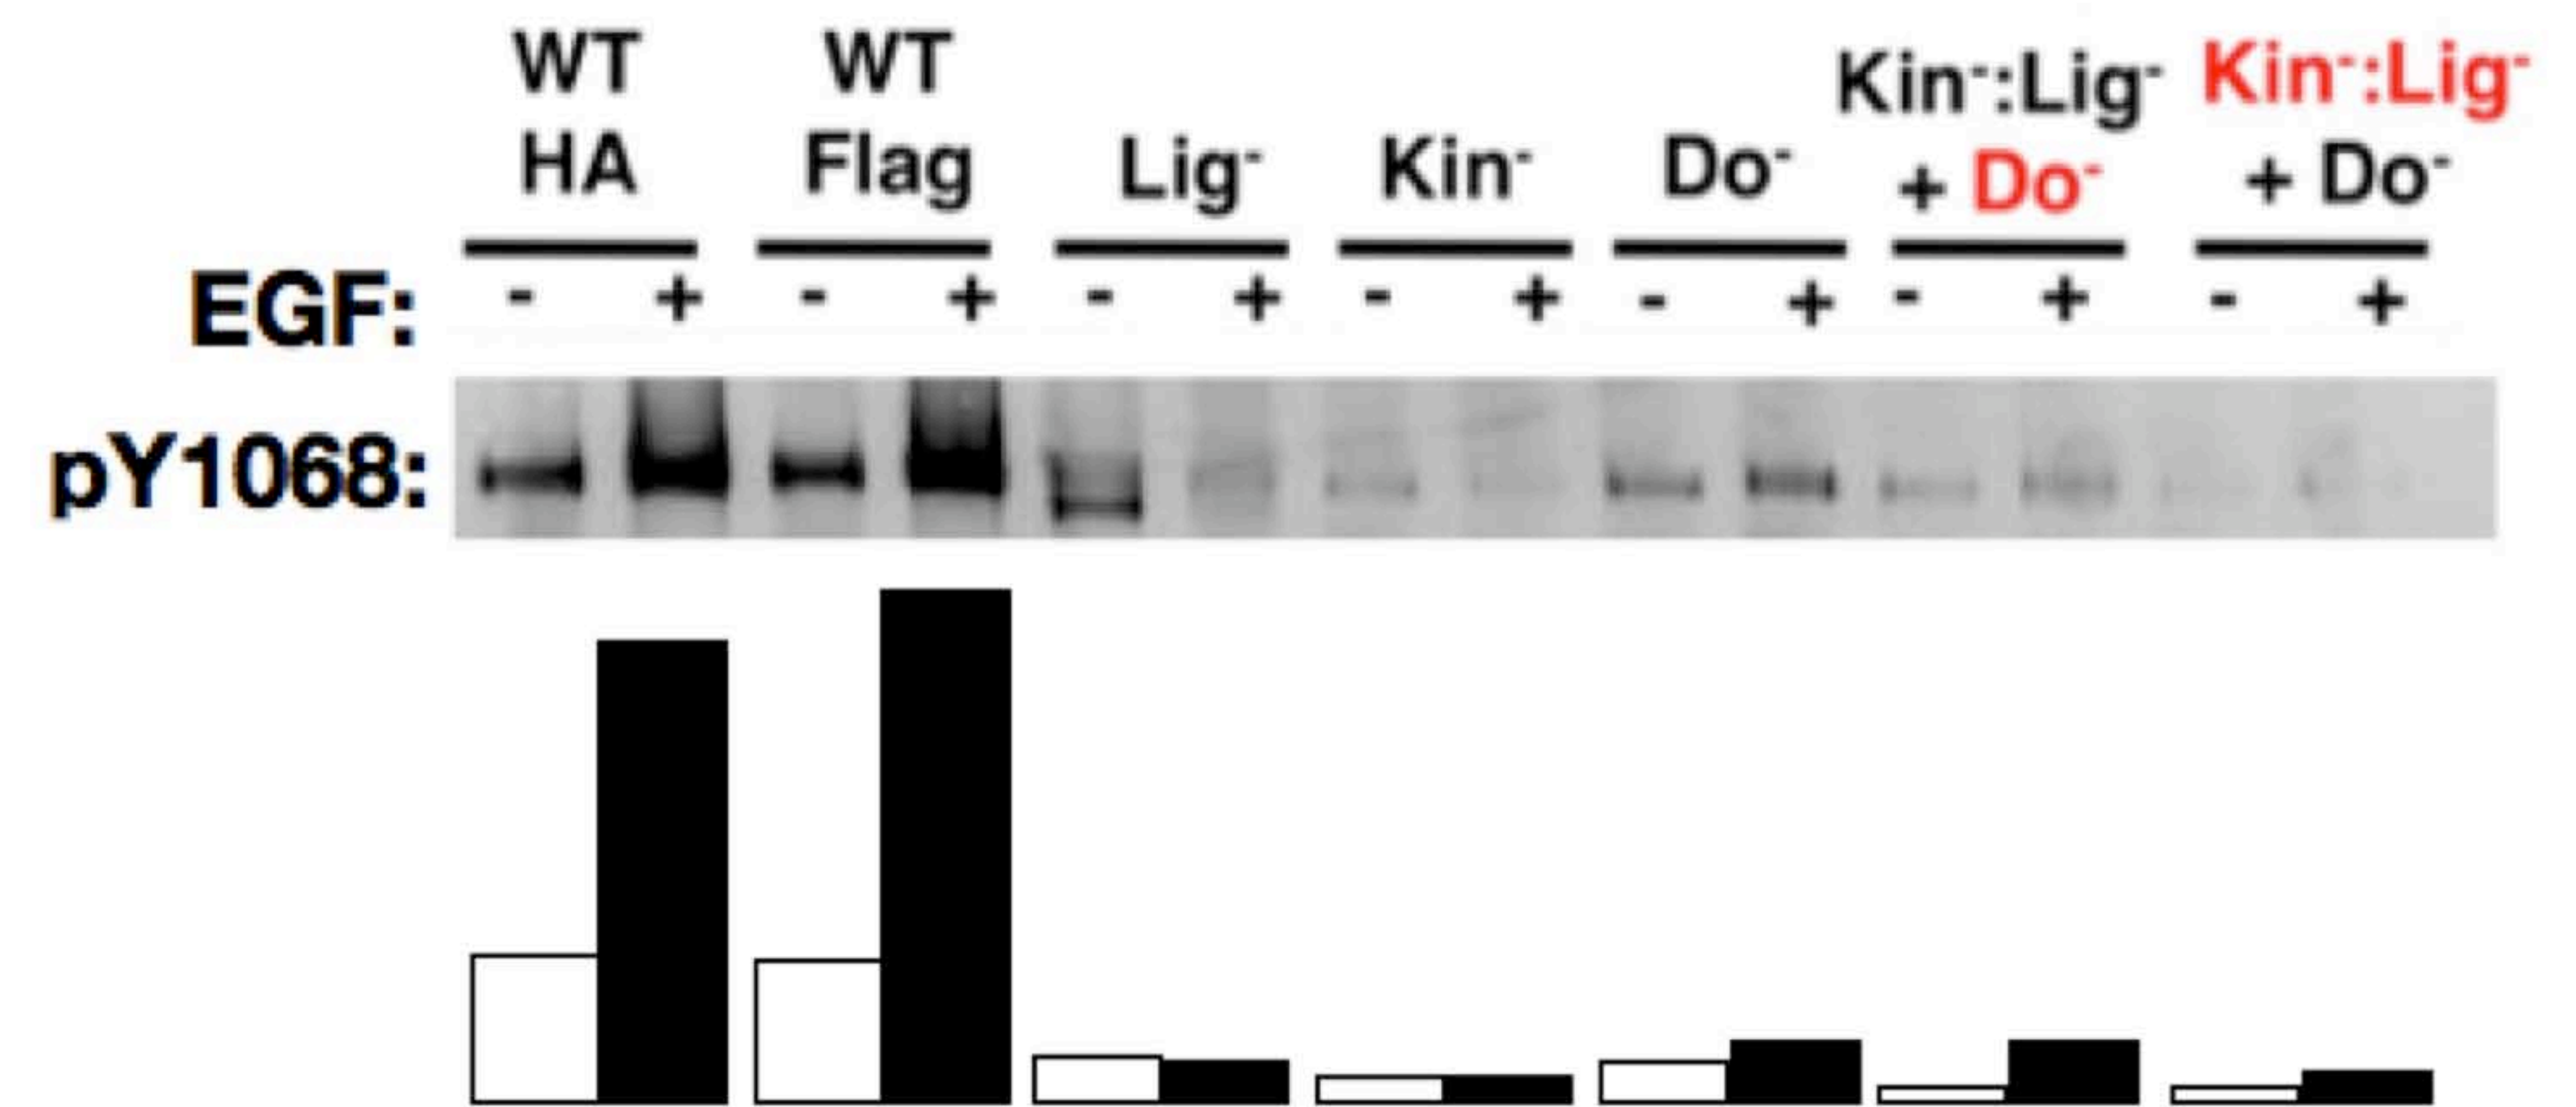



Figure S2

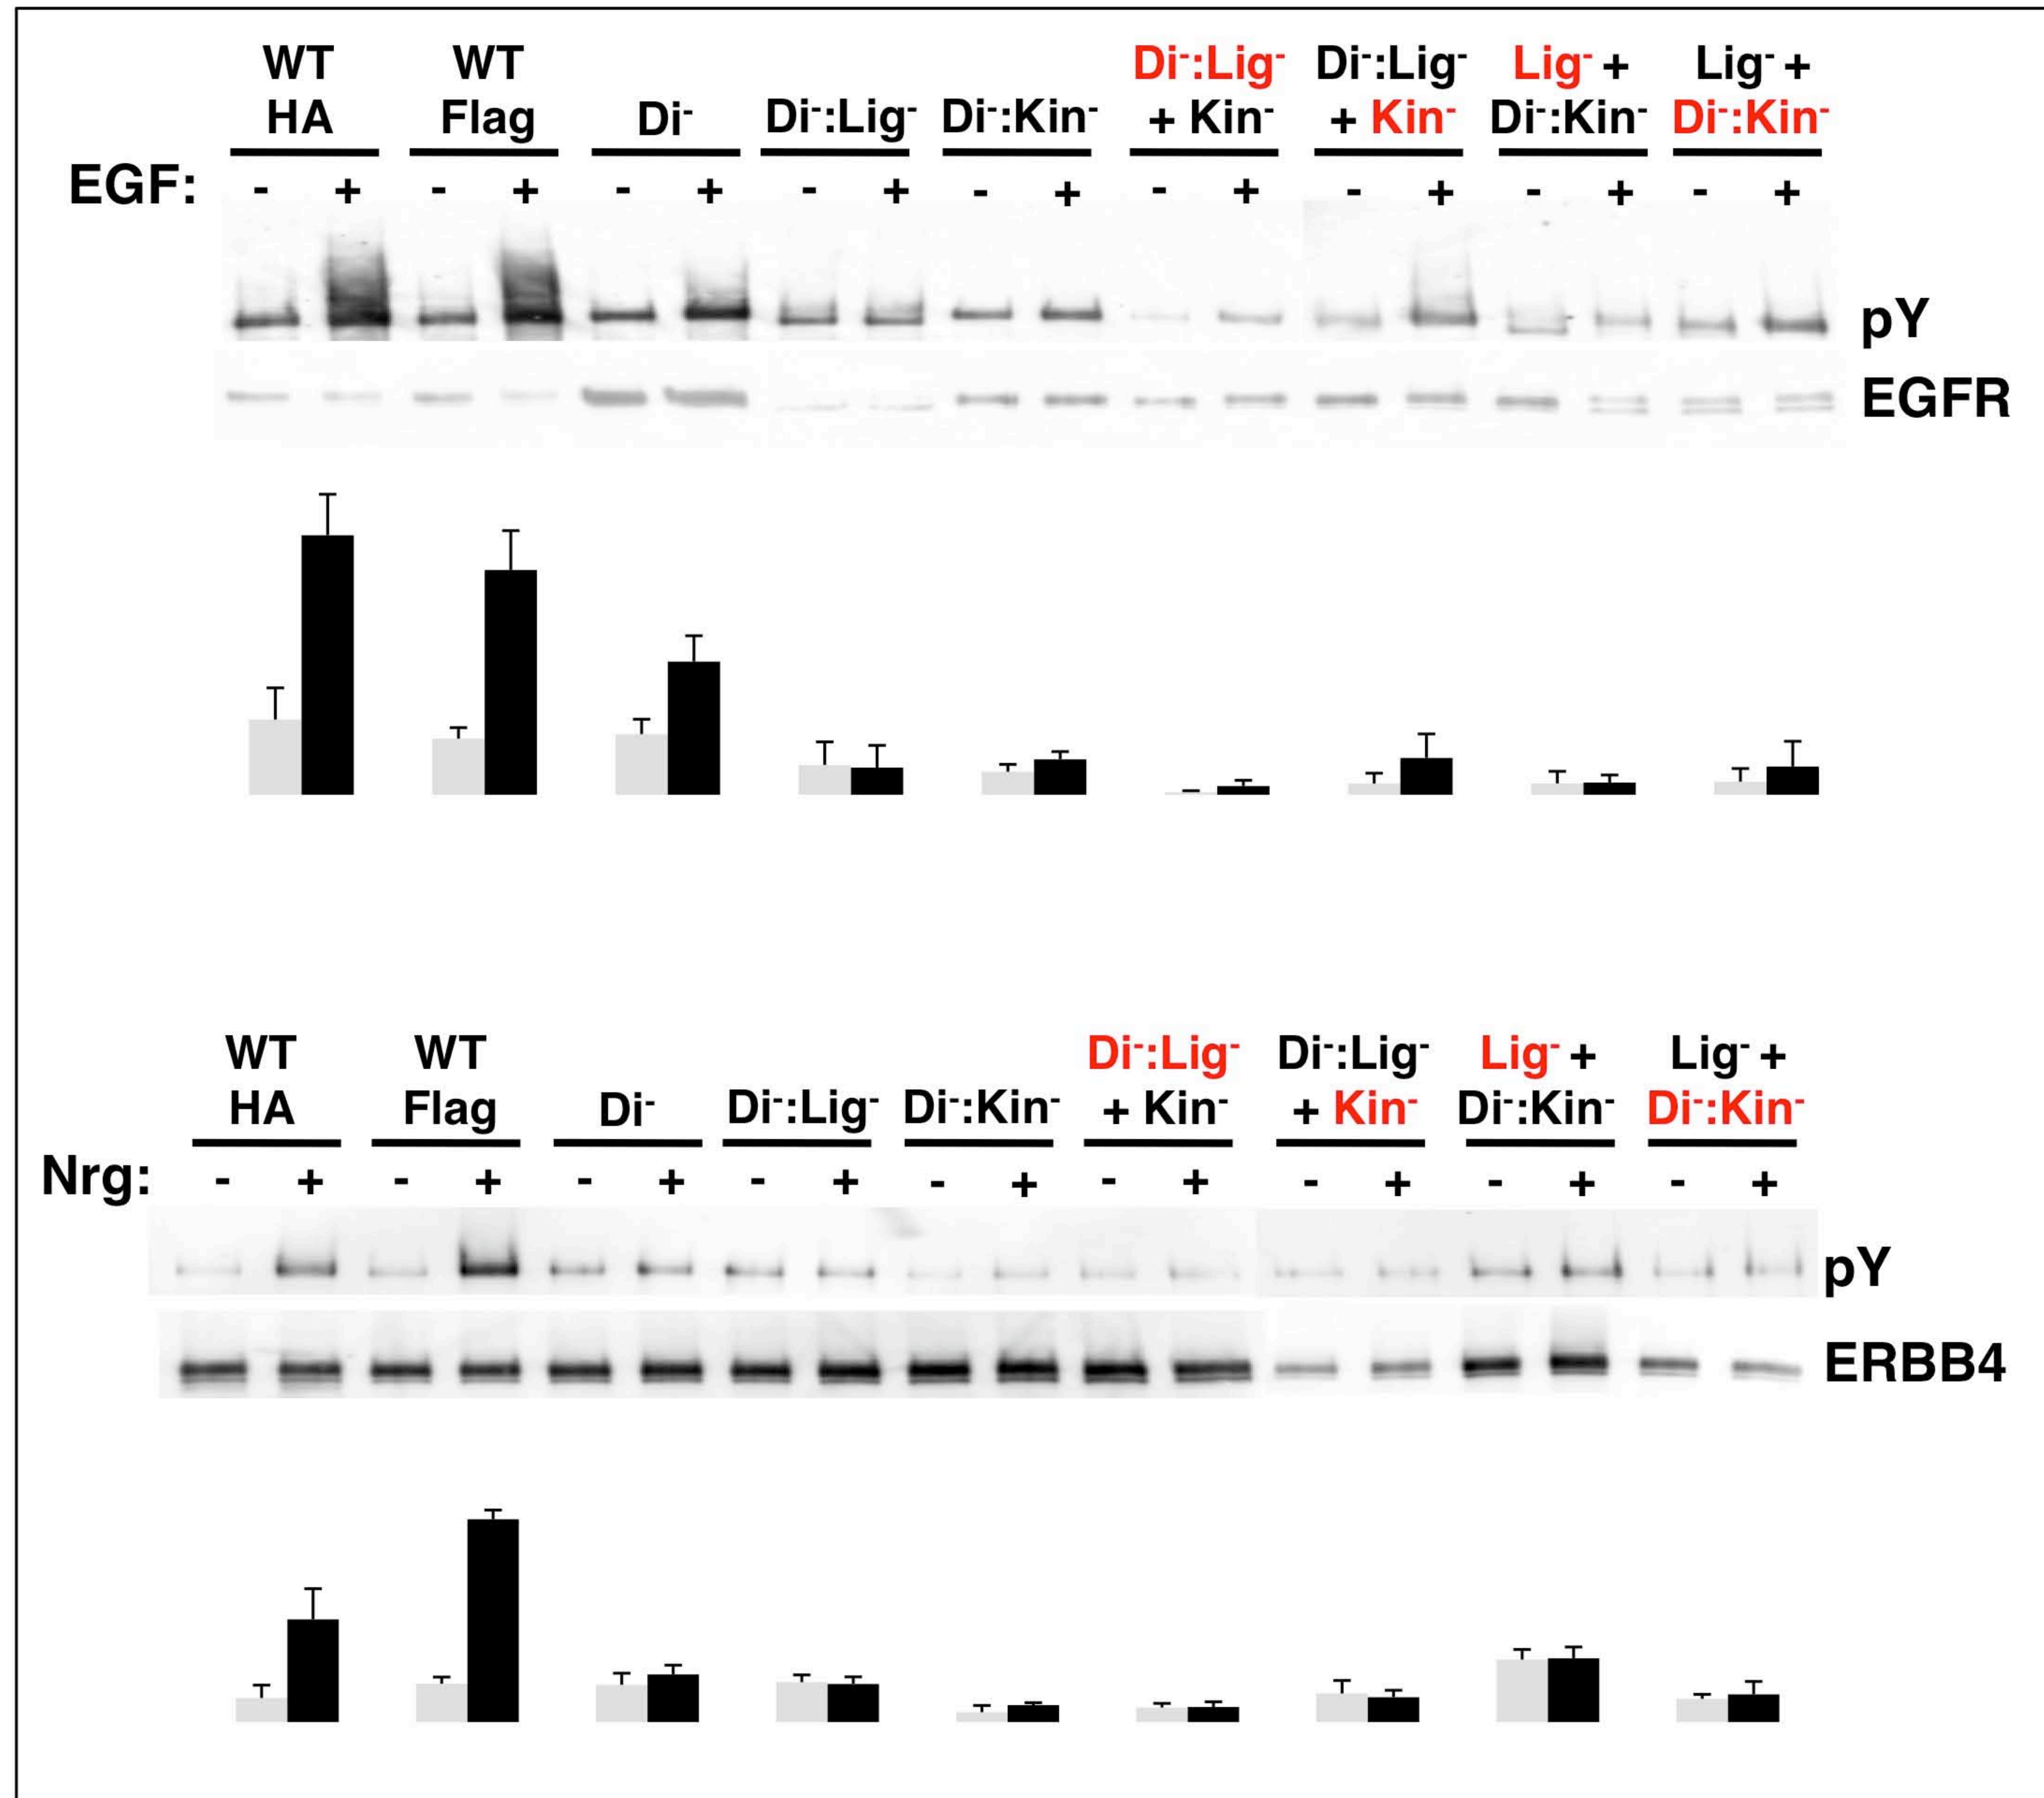



Figure S3

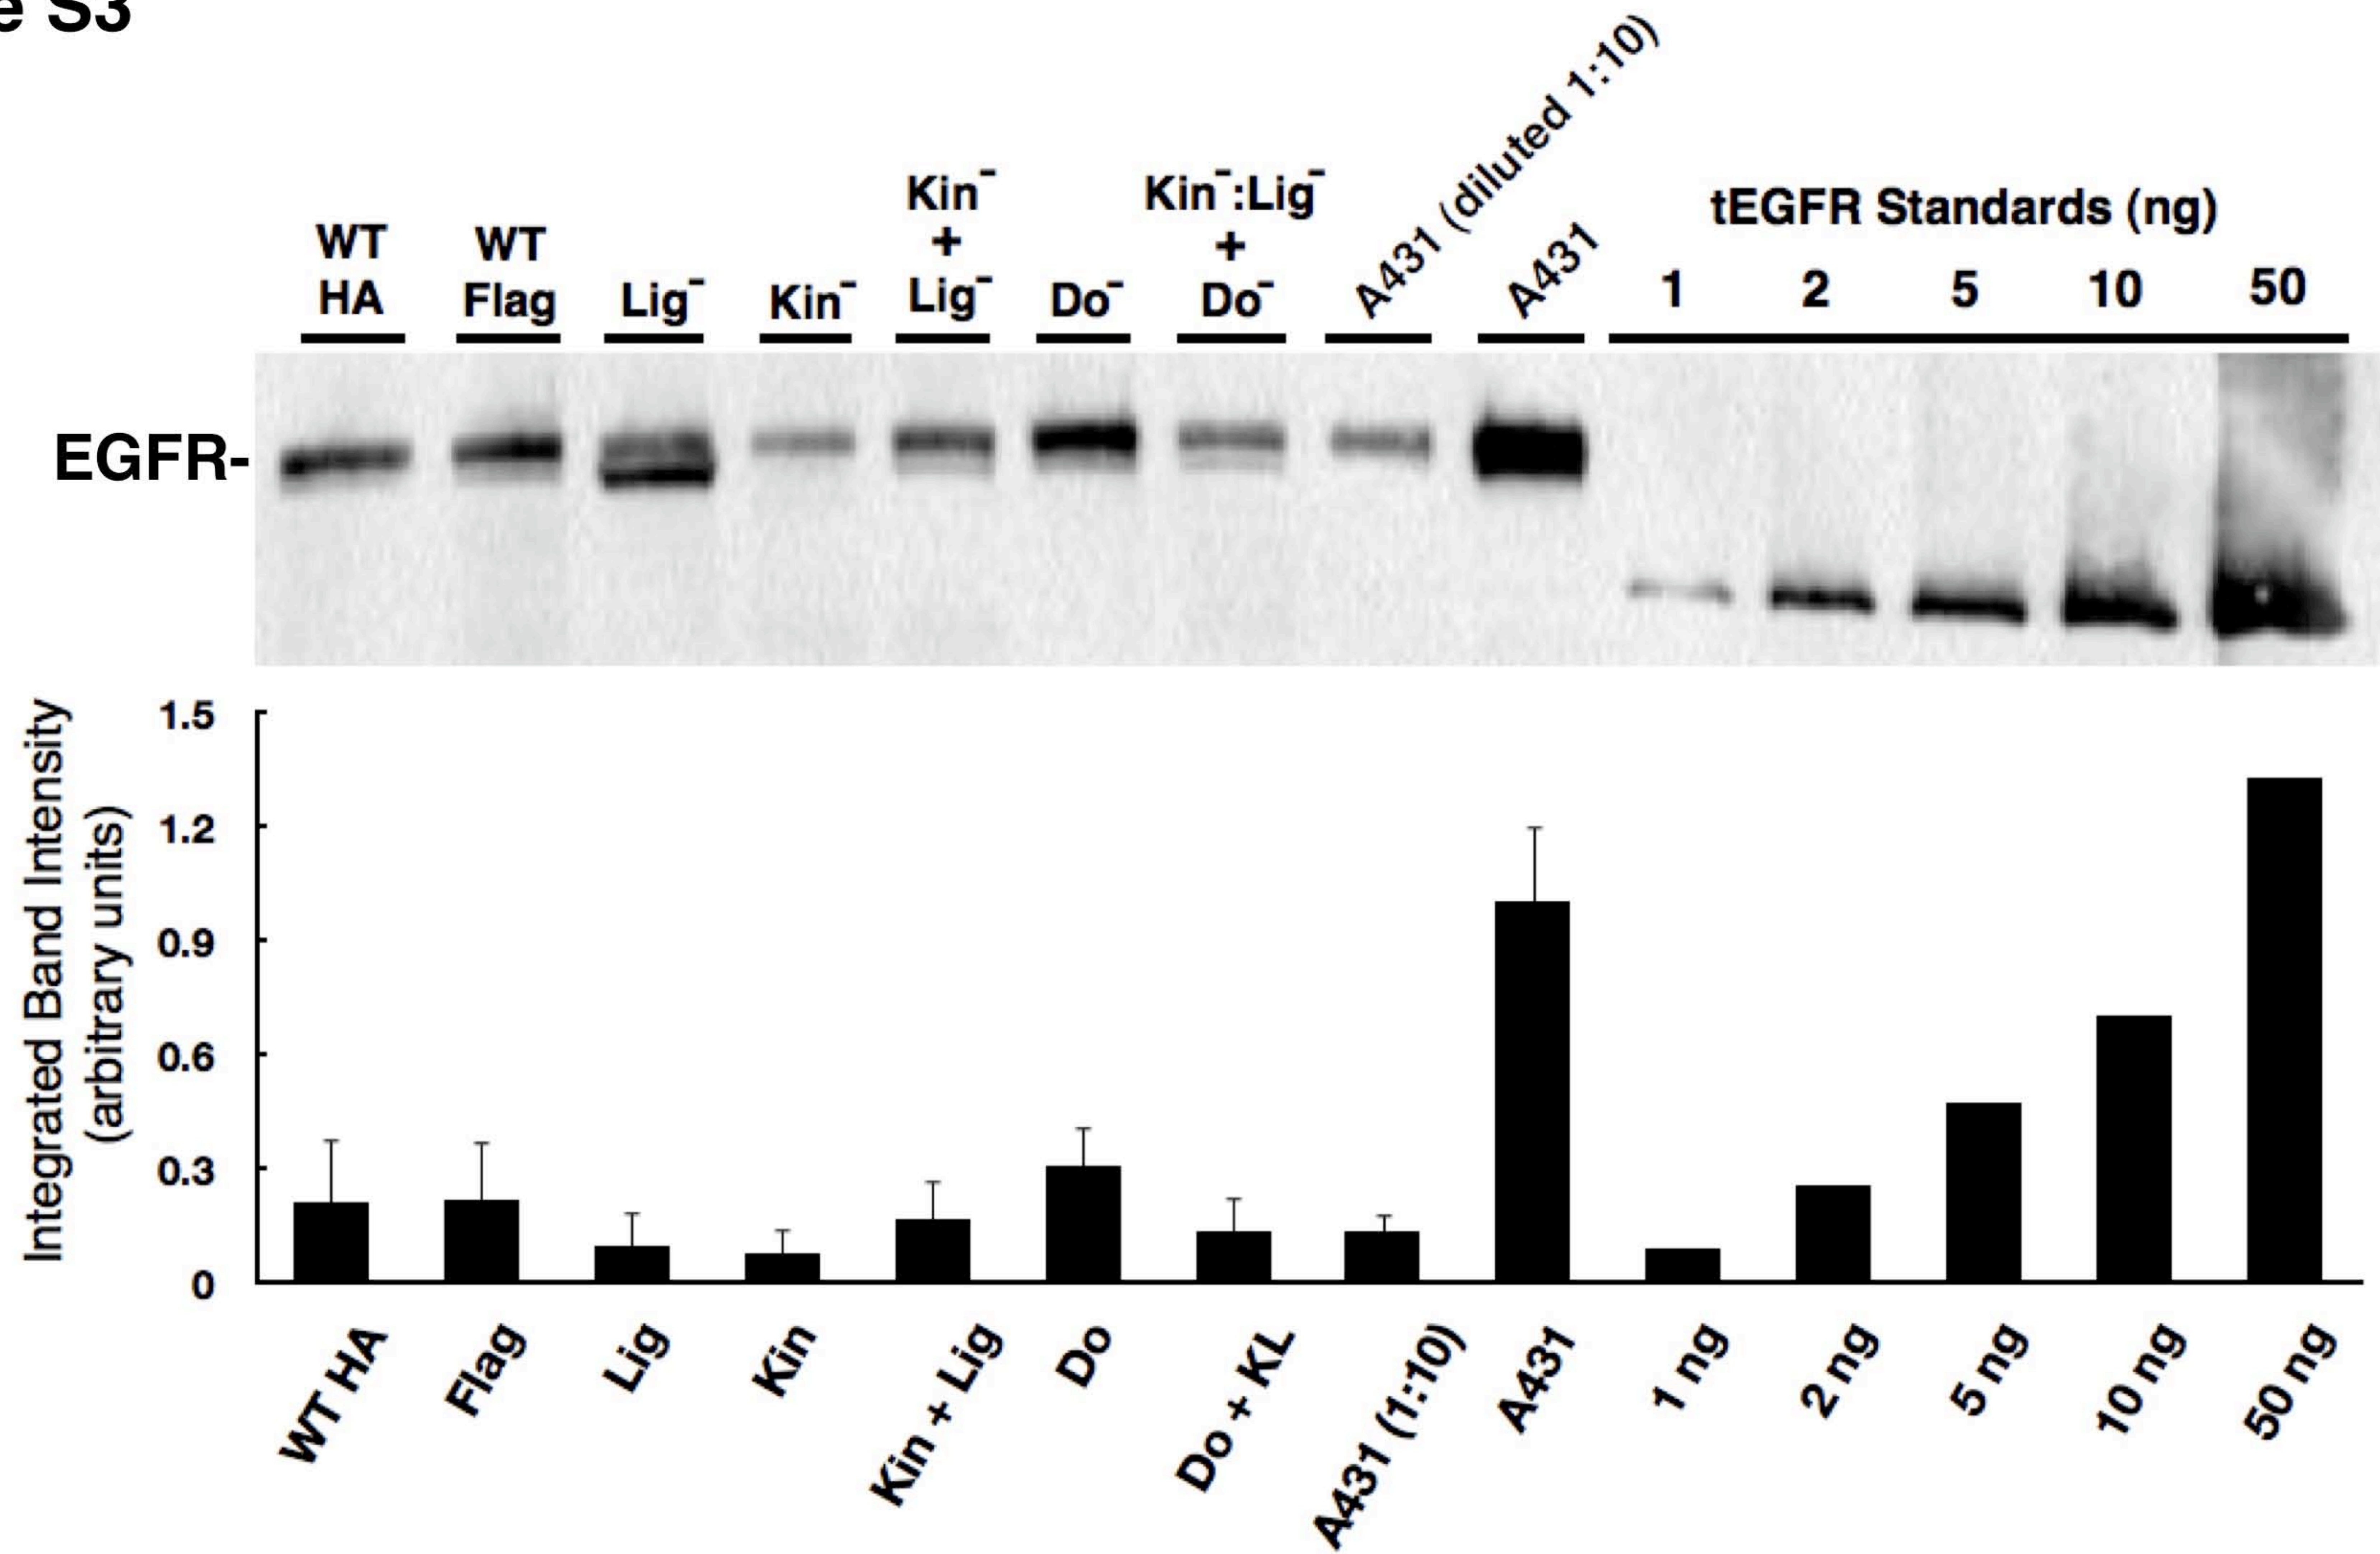



Figure S4

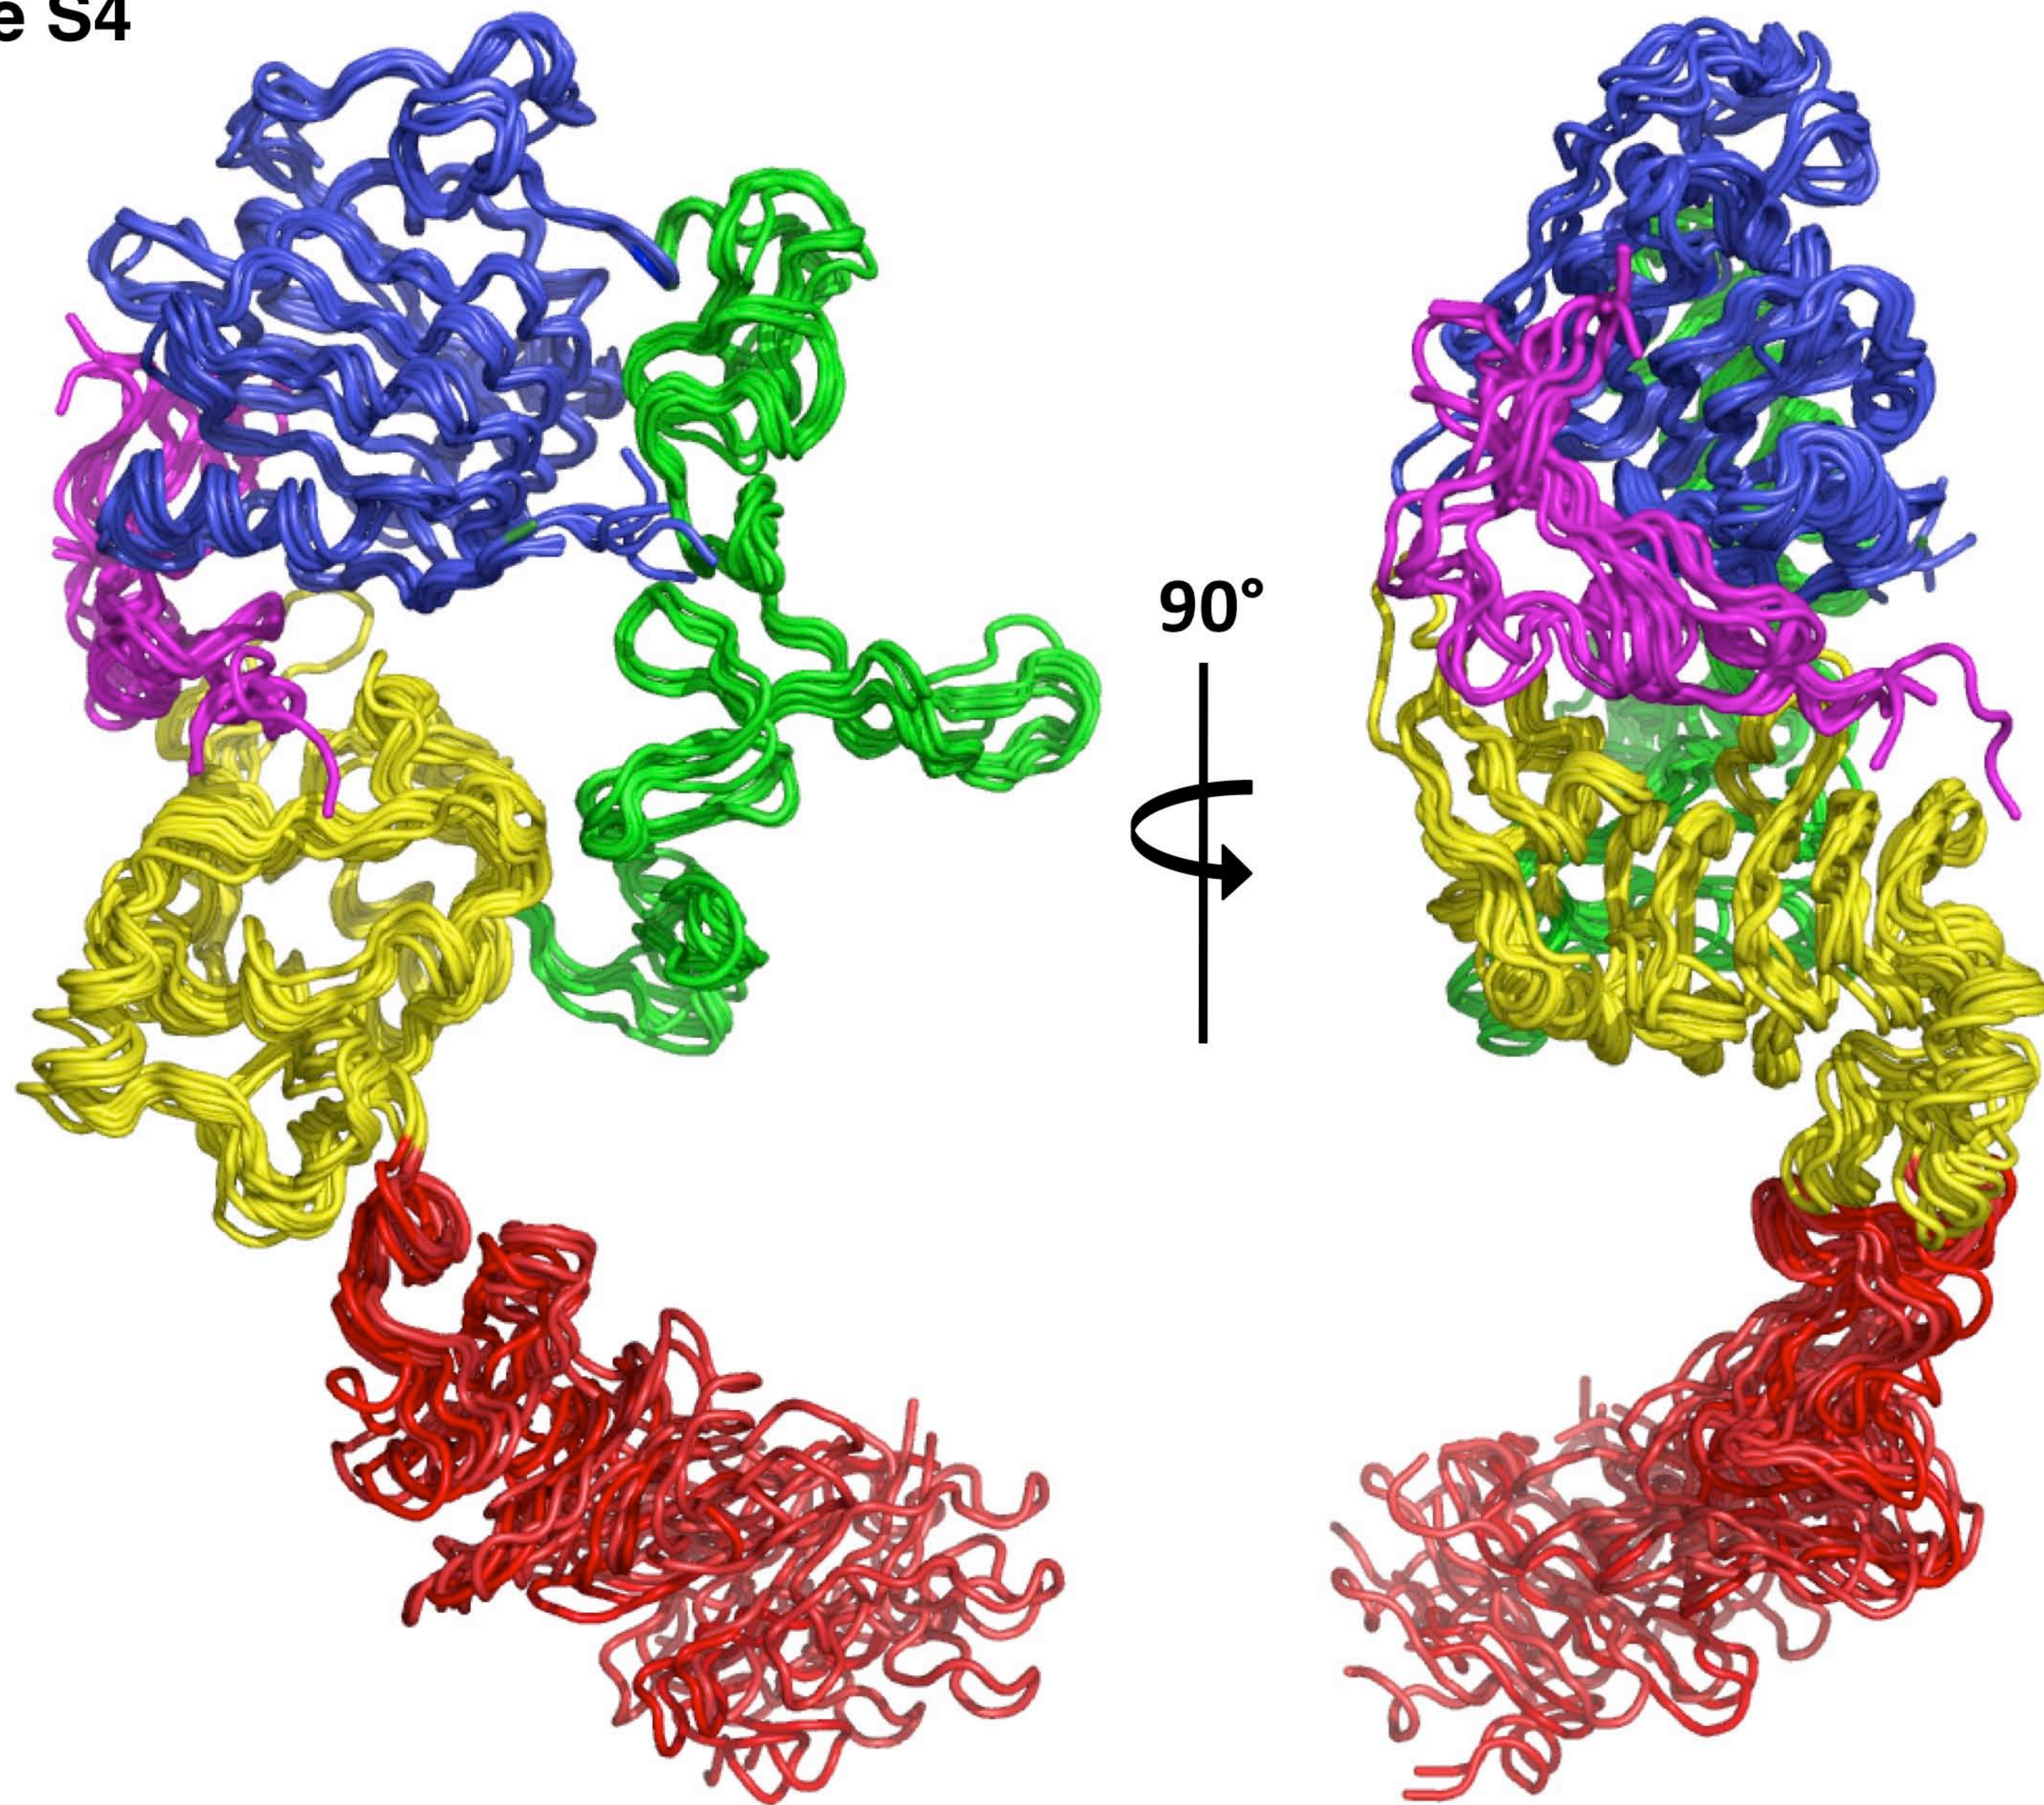



Figure S5

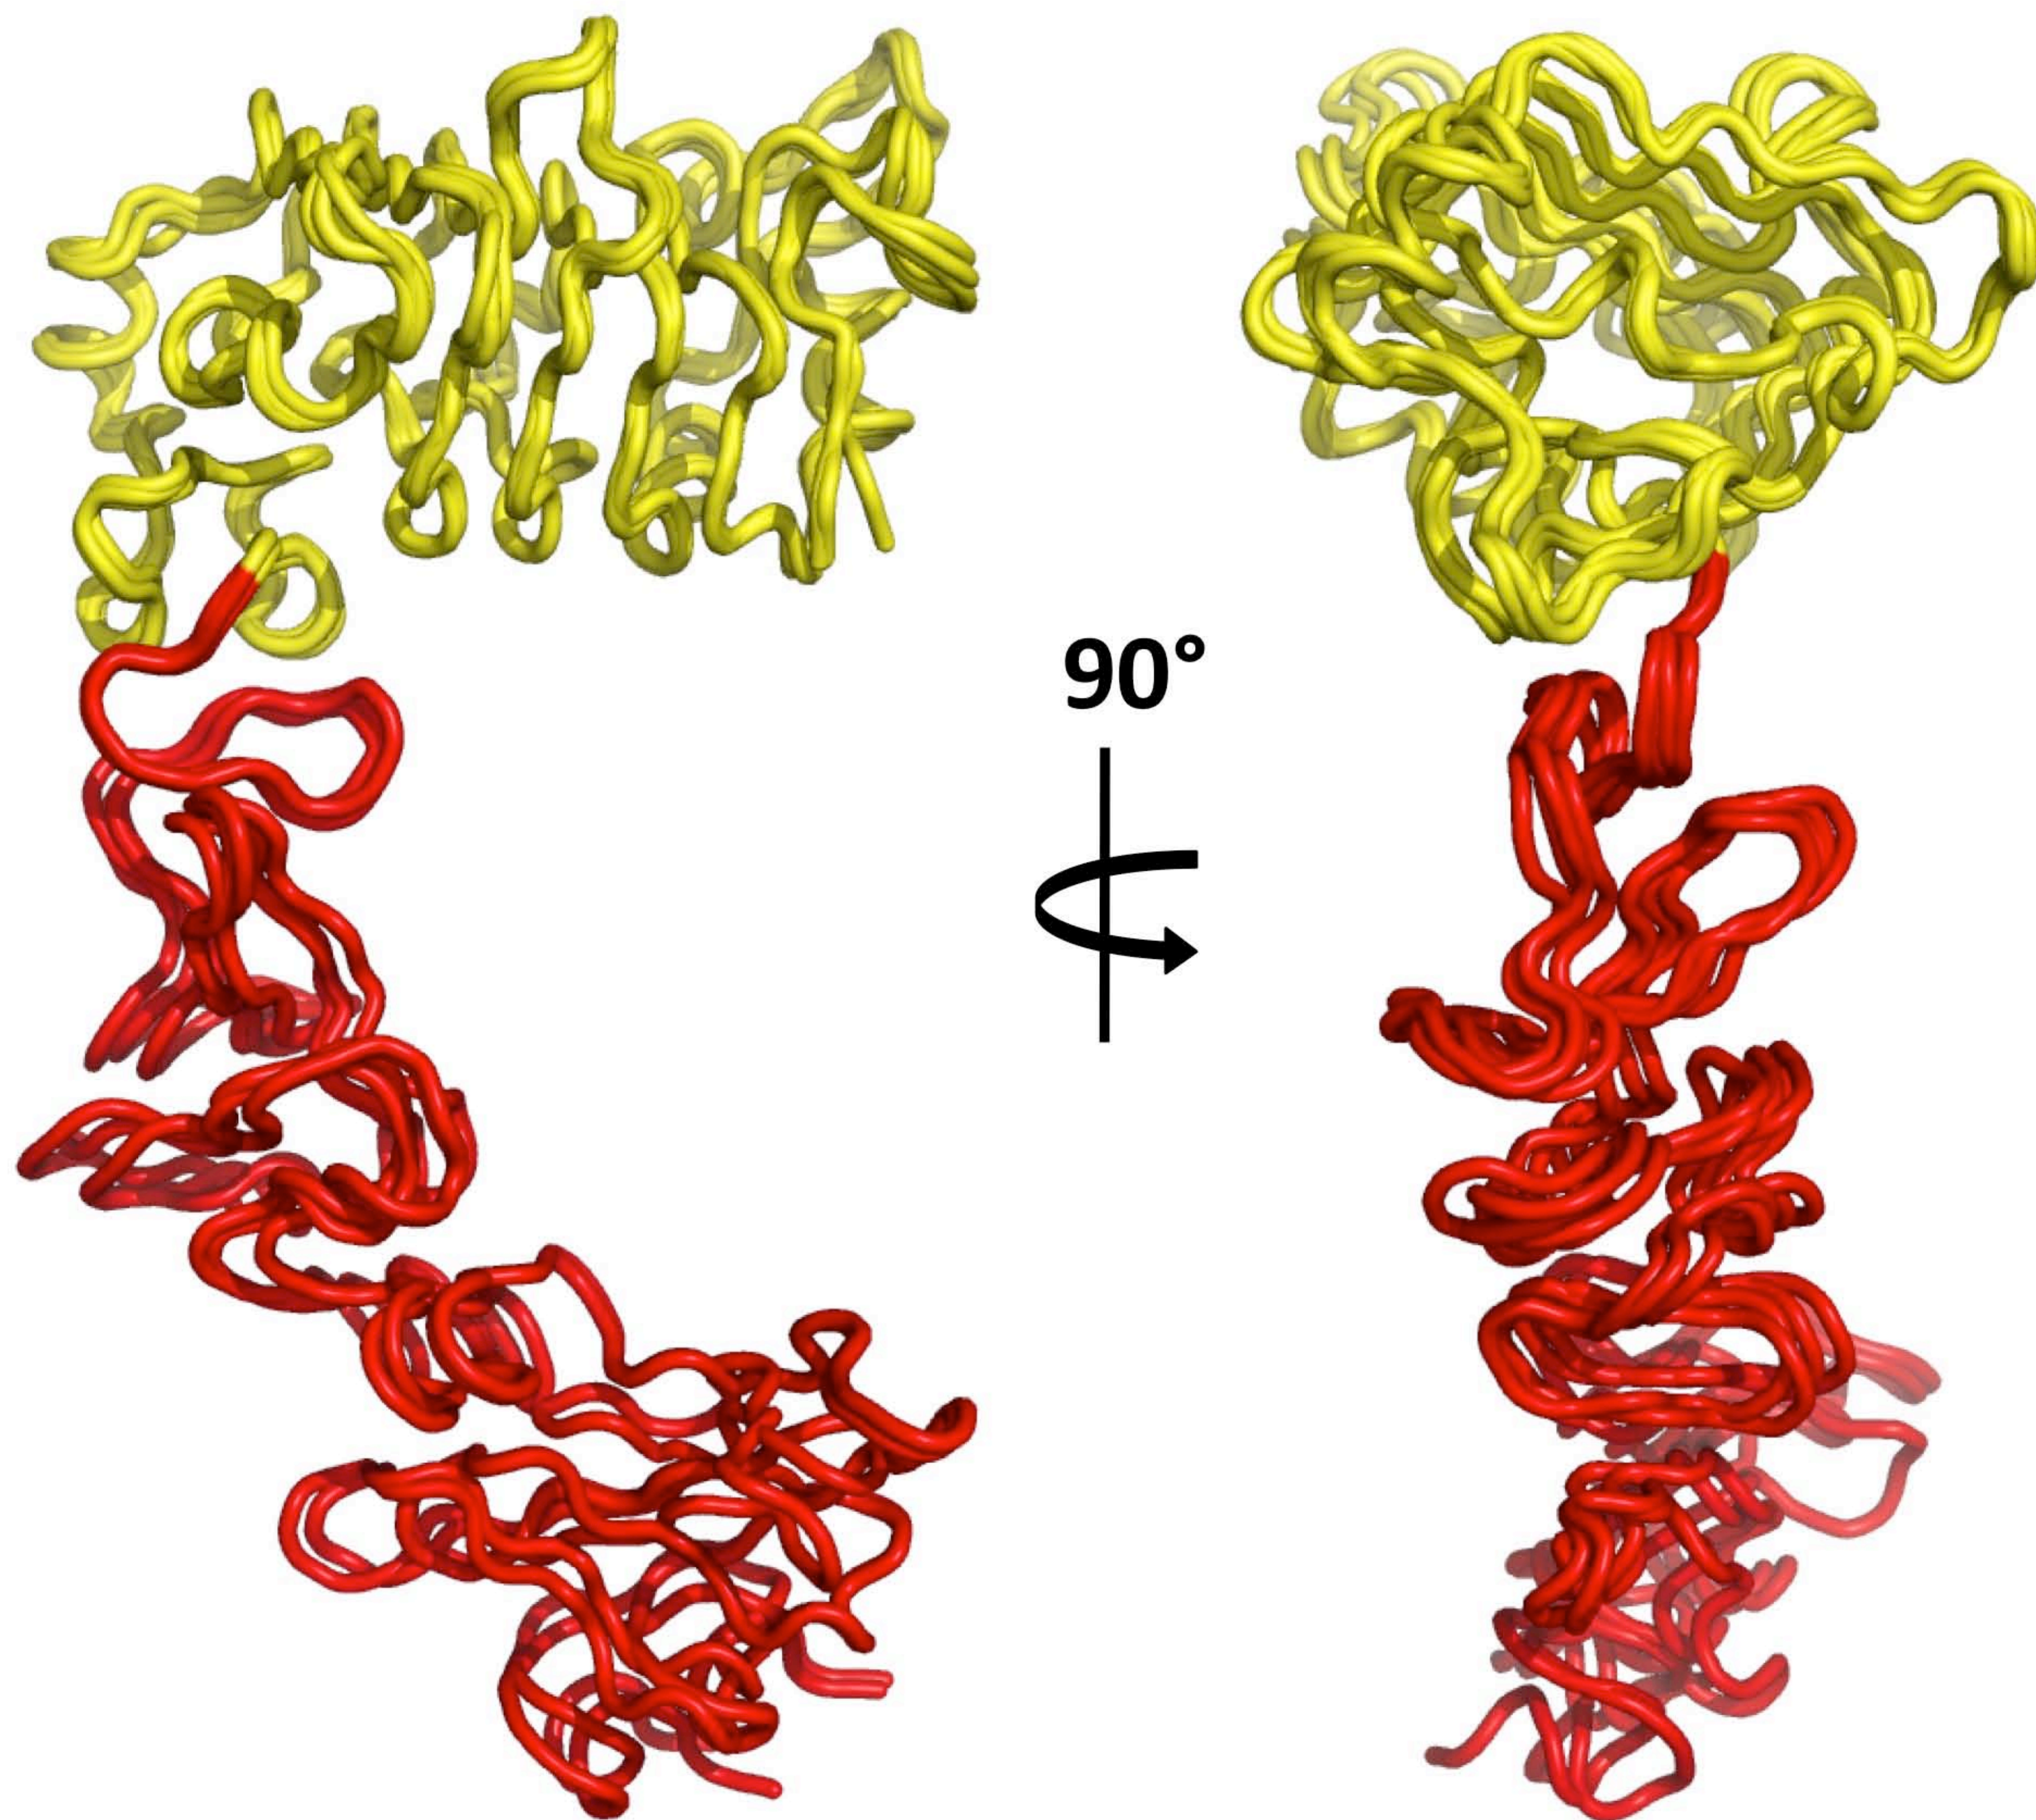



Figure S6

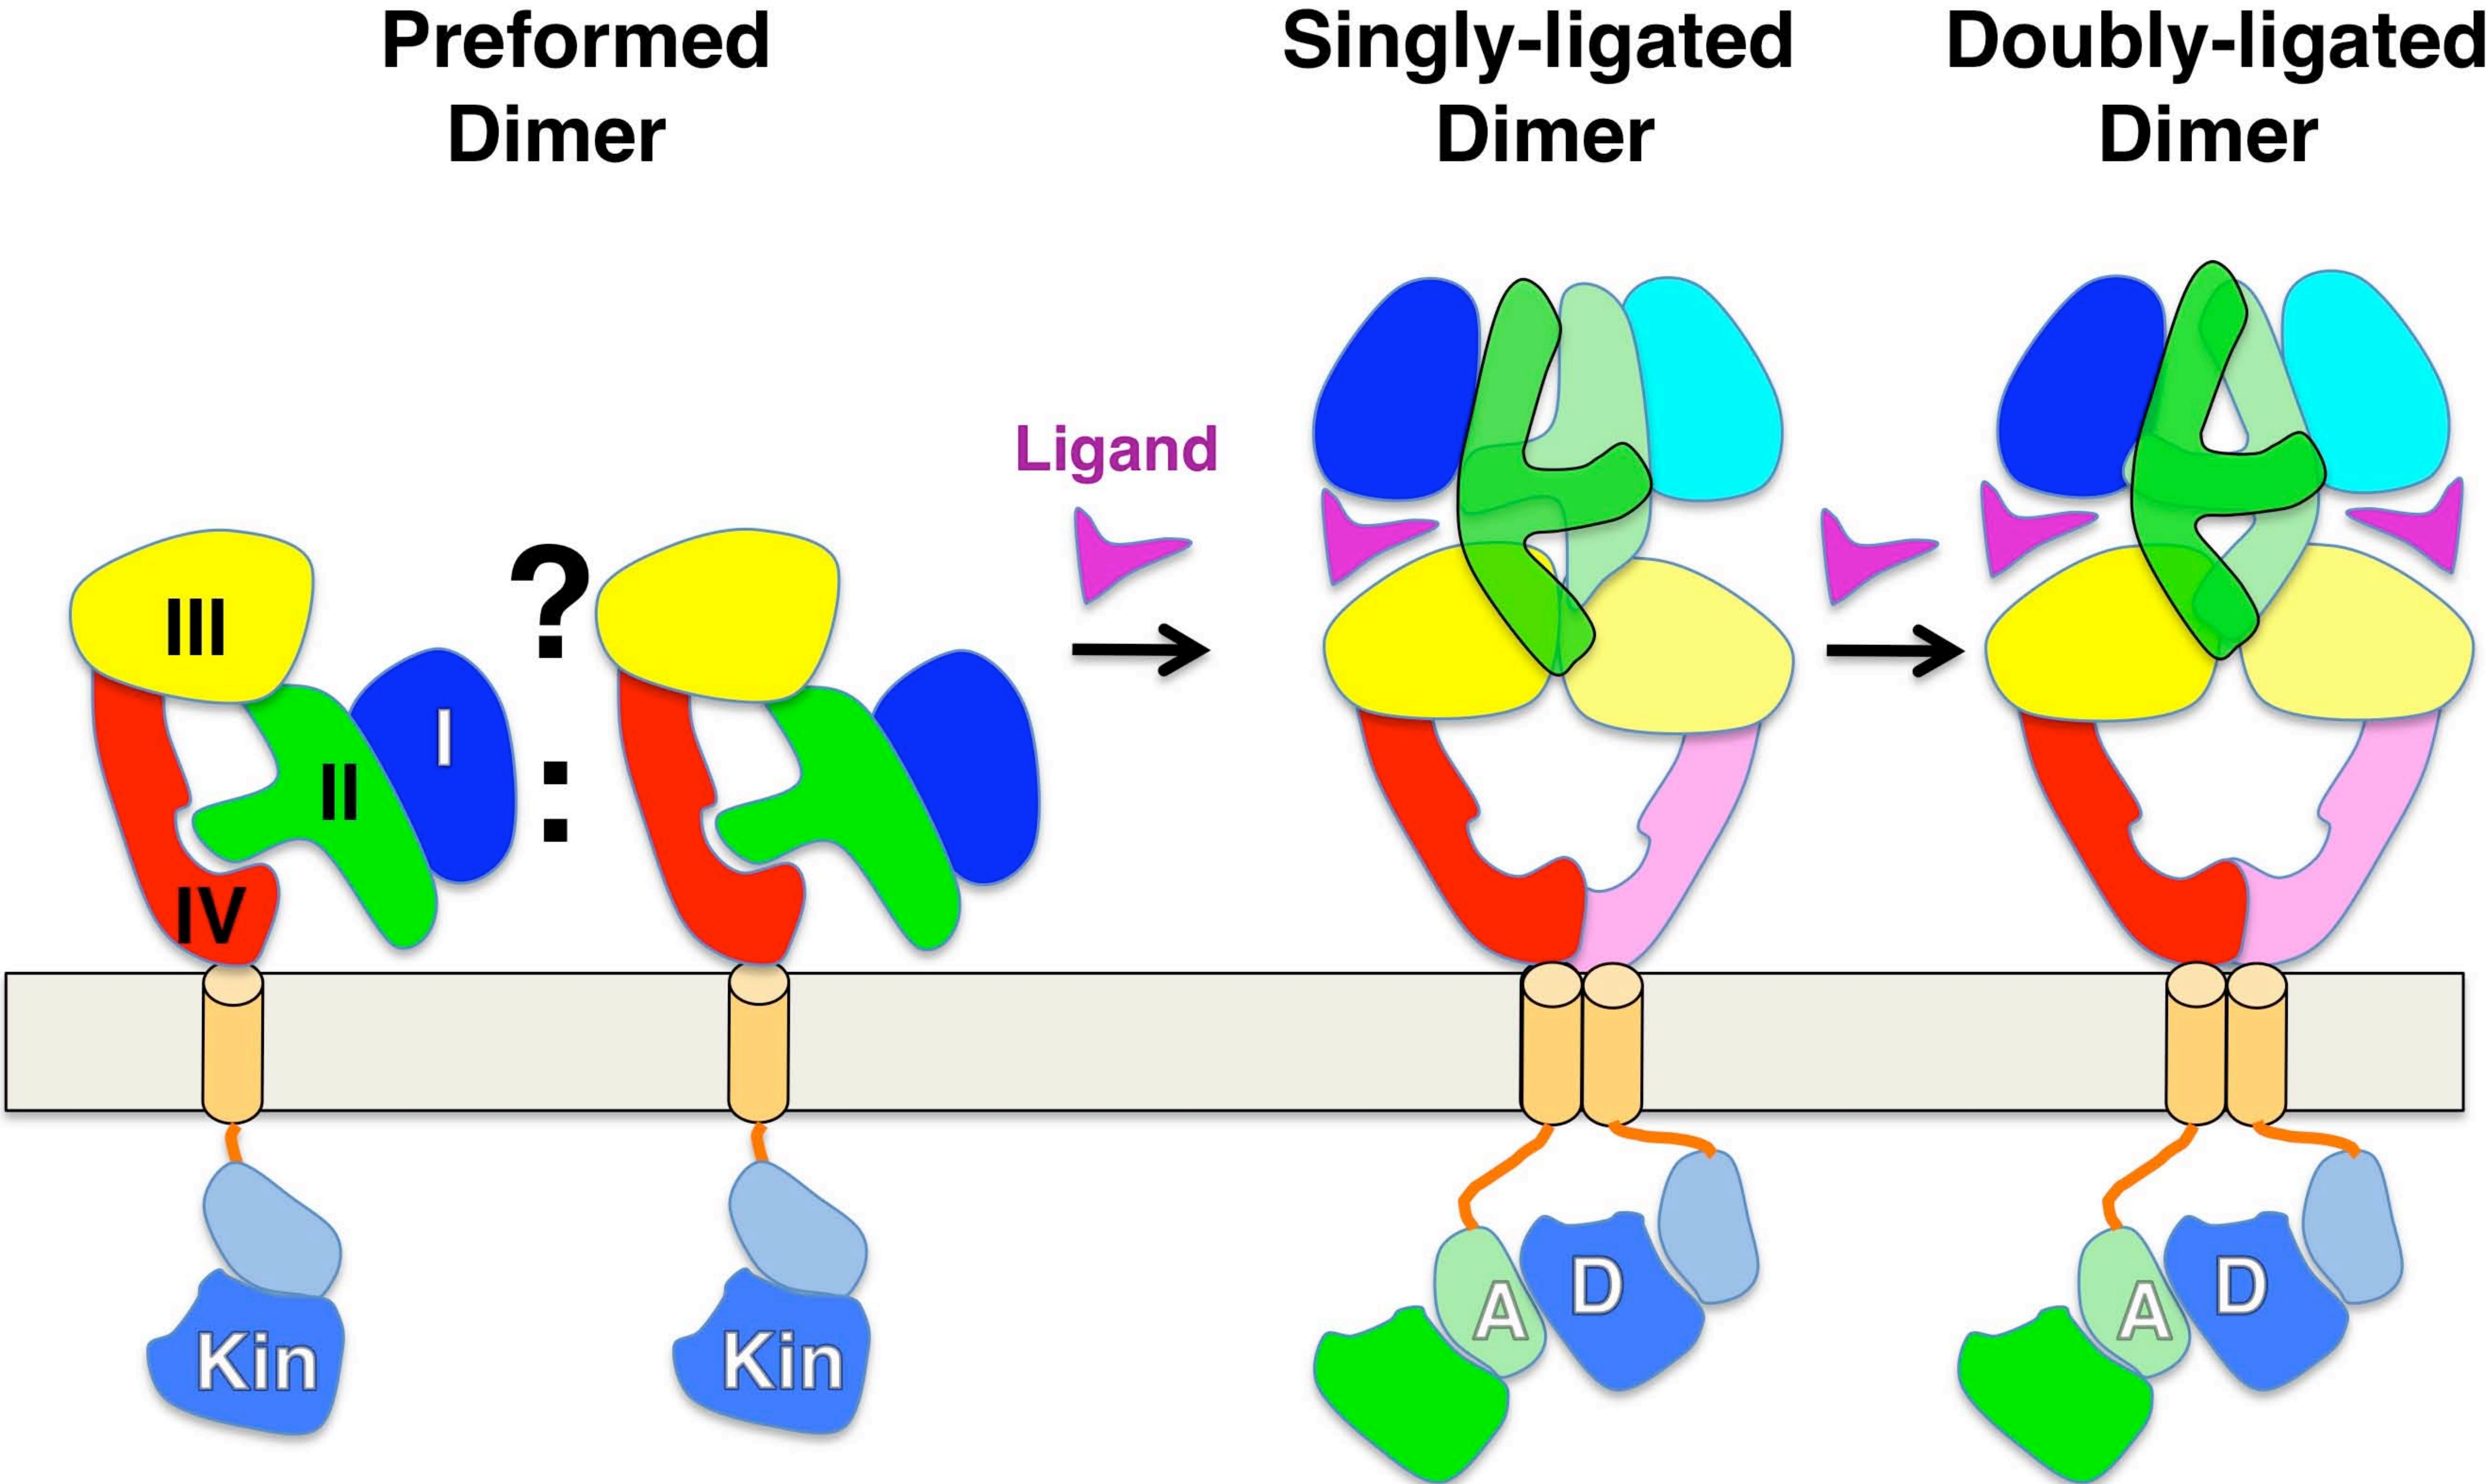



**Figure S7**

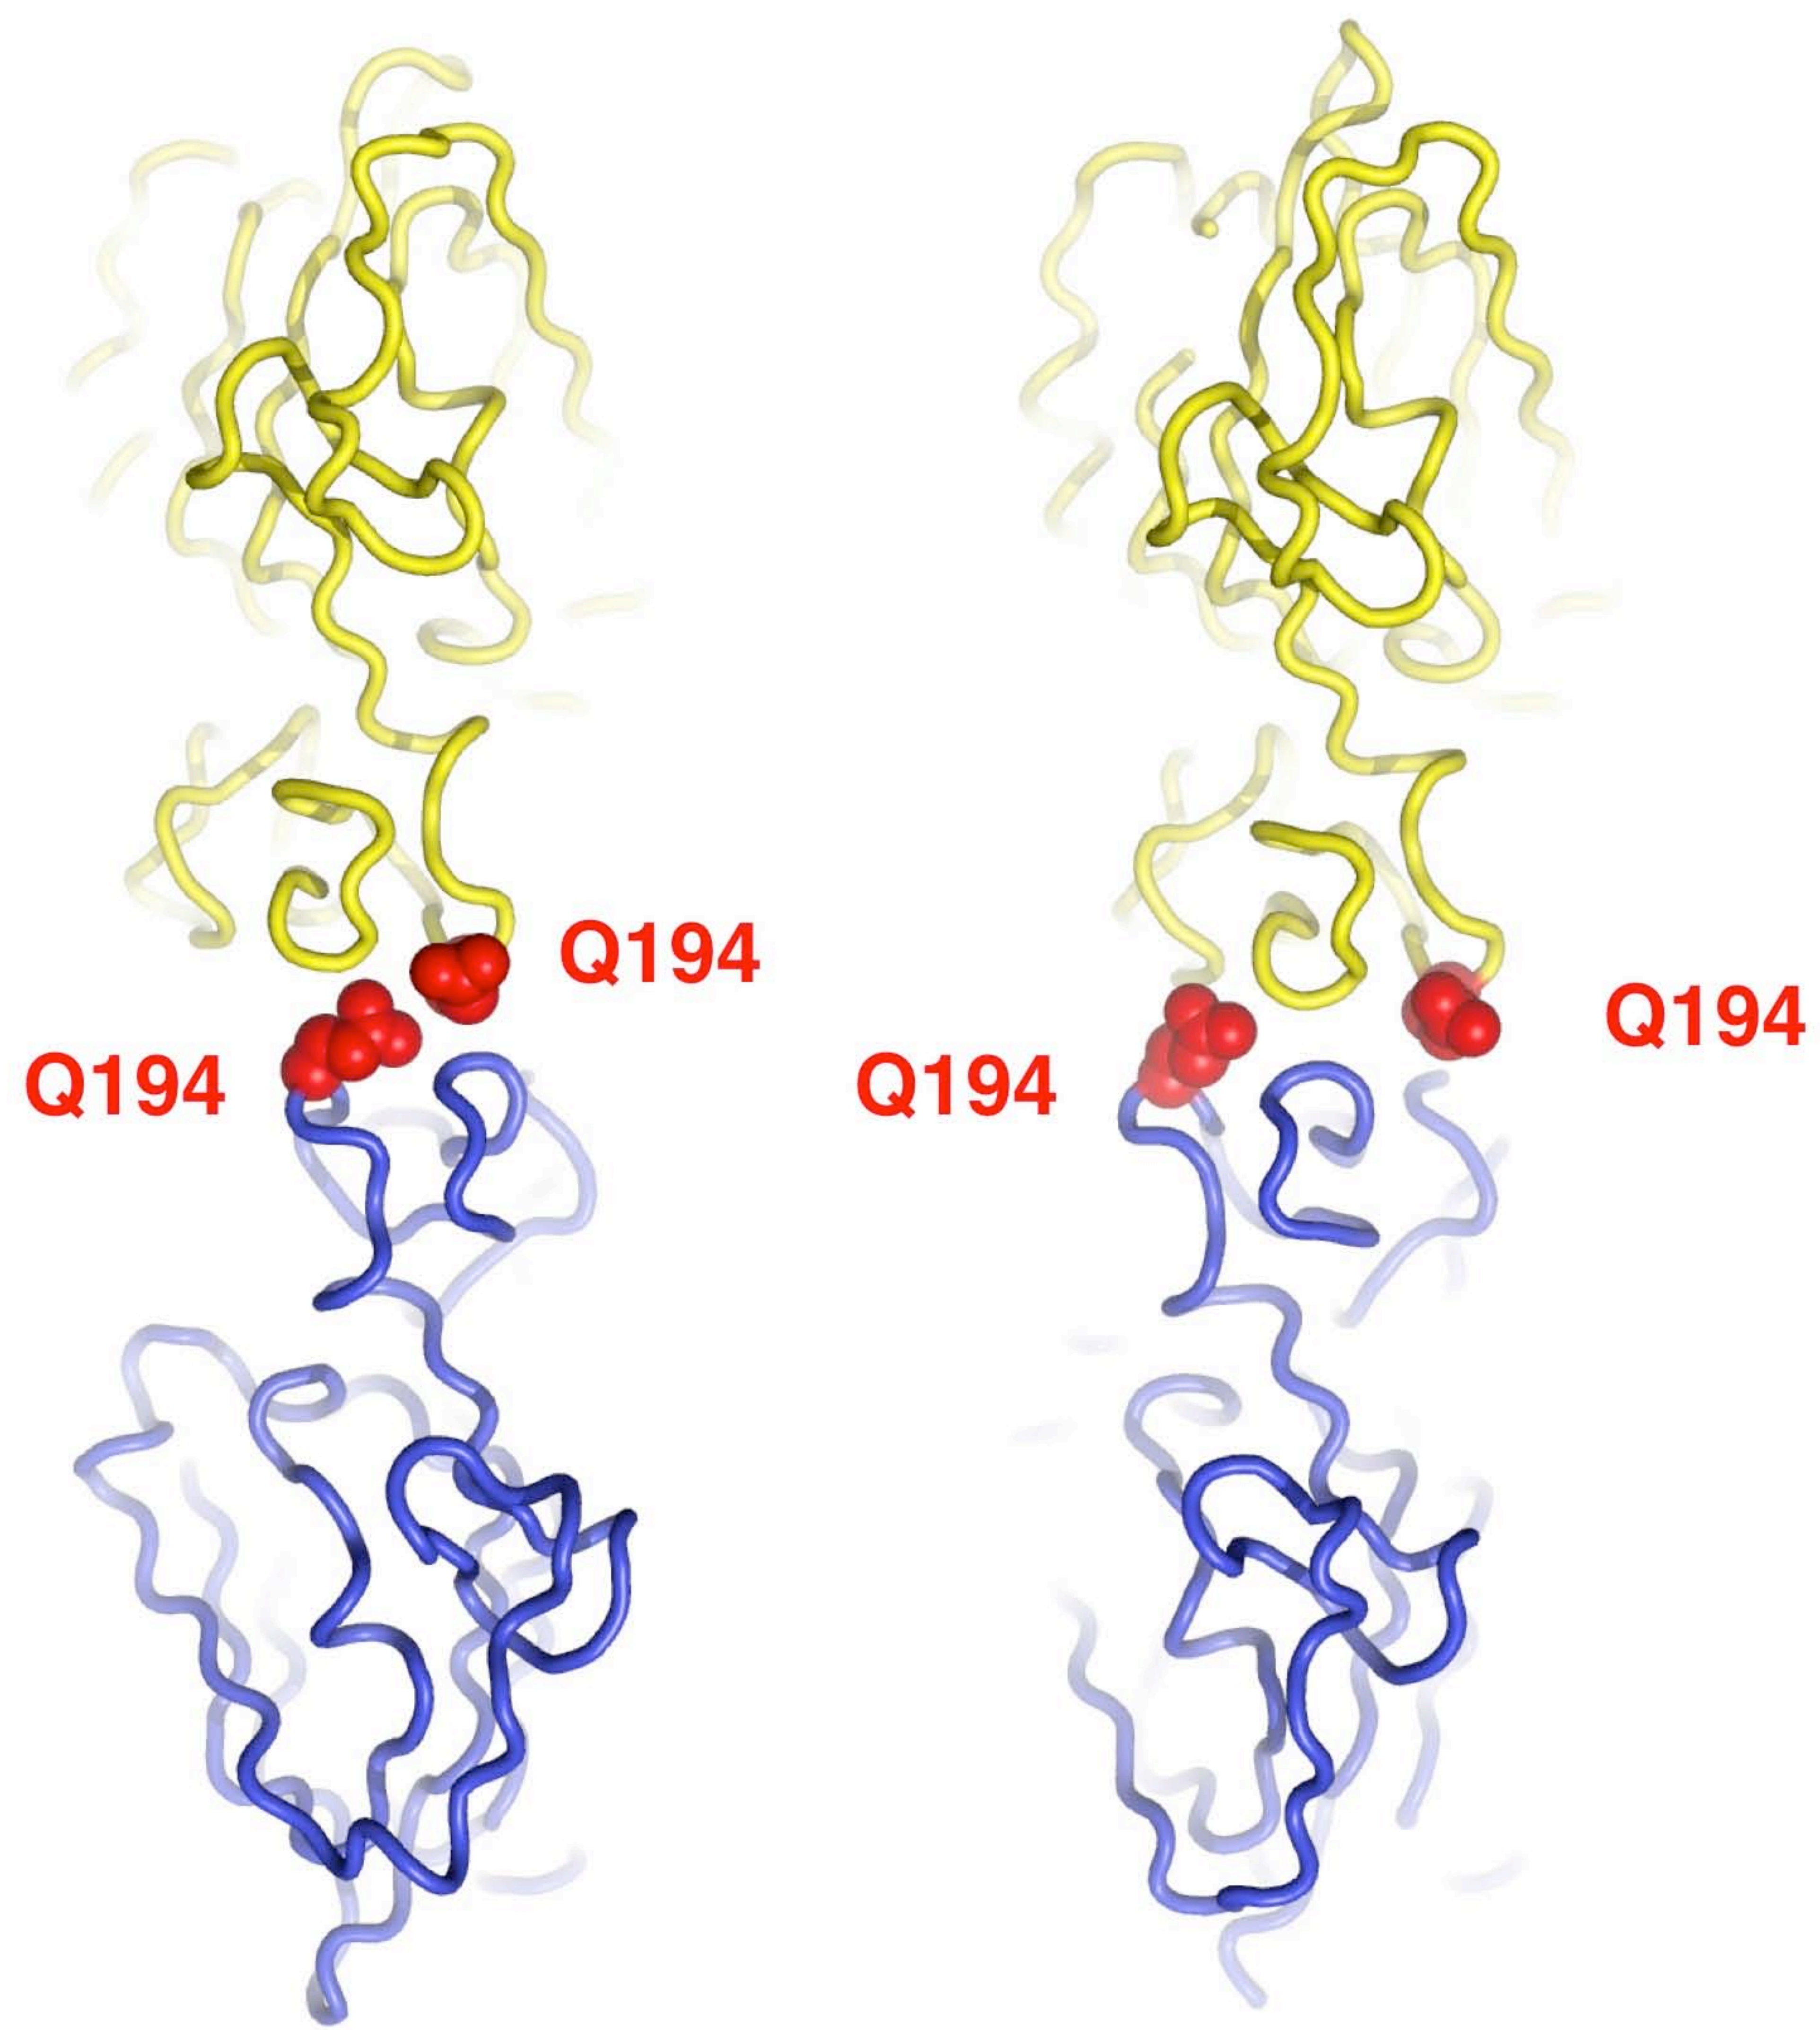

**tEGFR:TGF $\alpha$**

**sEGFR:EGF**



**Figure S8**

**Drosophila EGFR + Spitz Ligand**

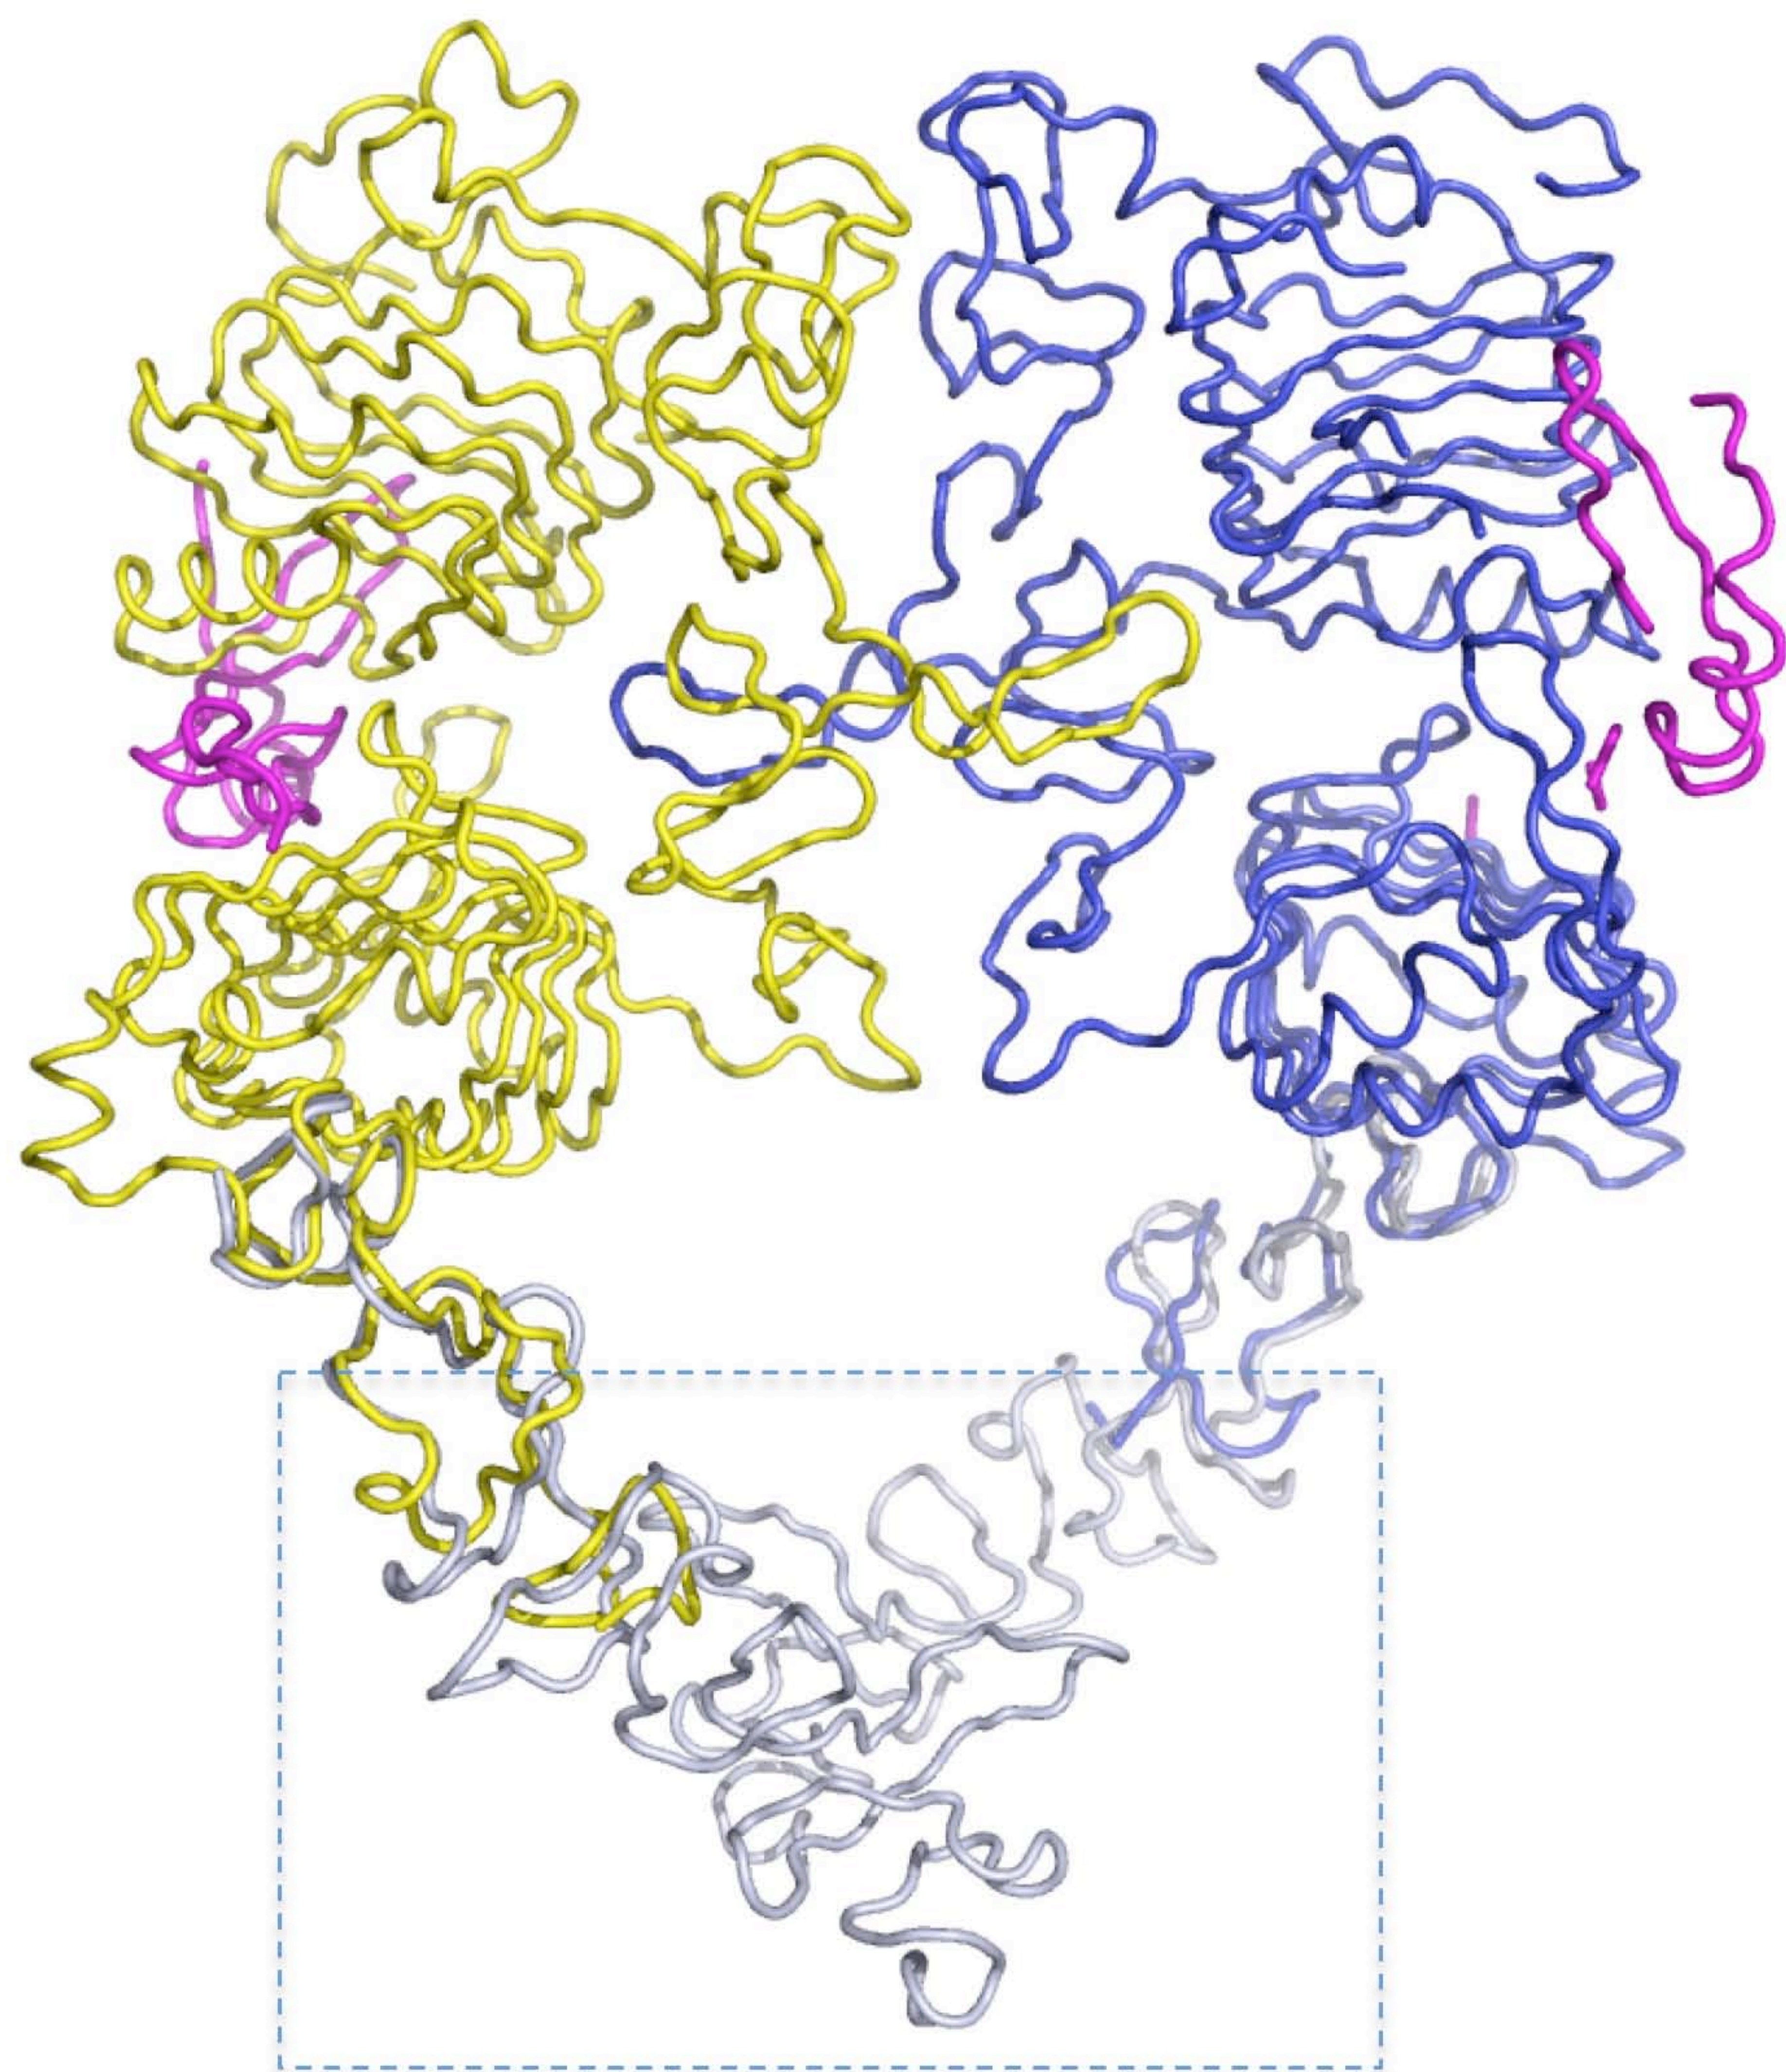

**Modeled Domain IV Position**

90°  
↻

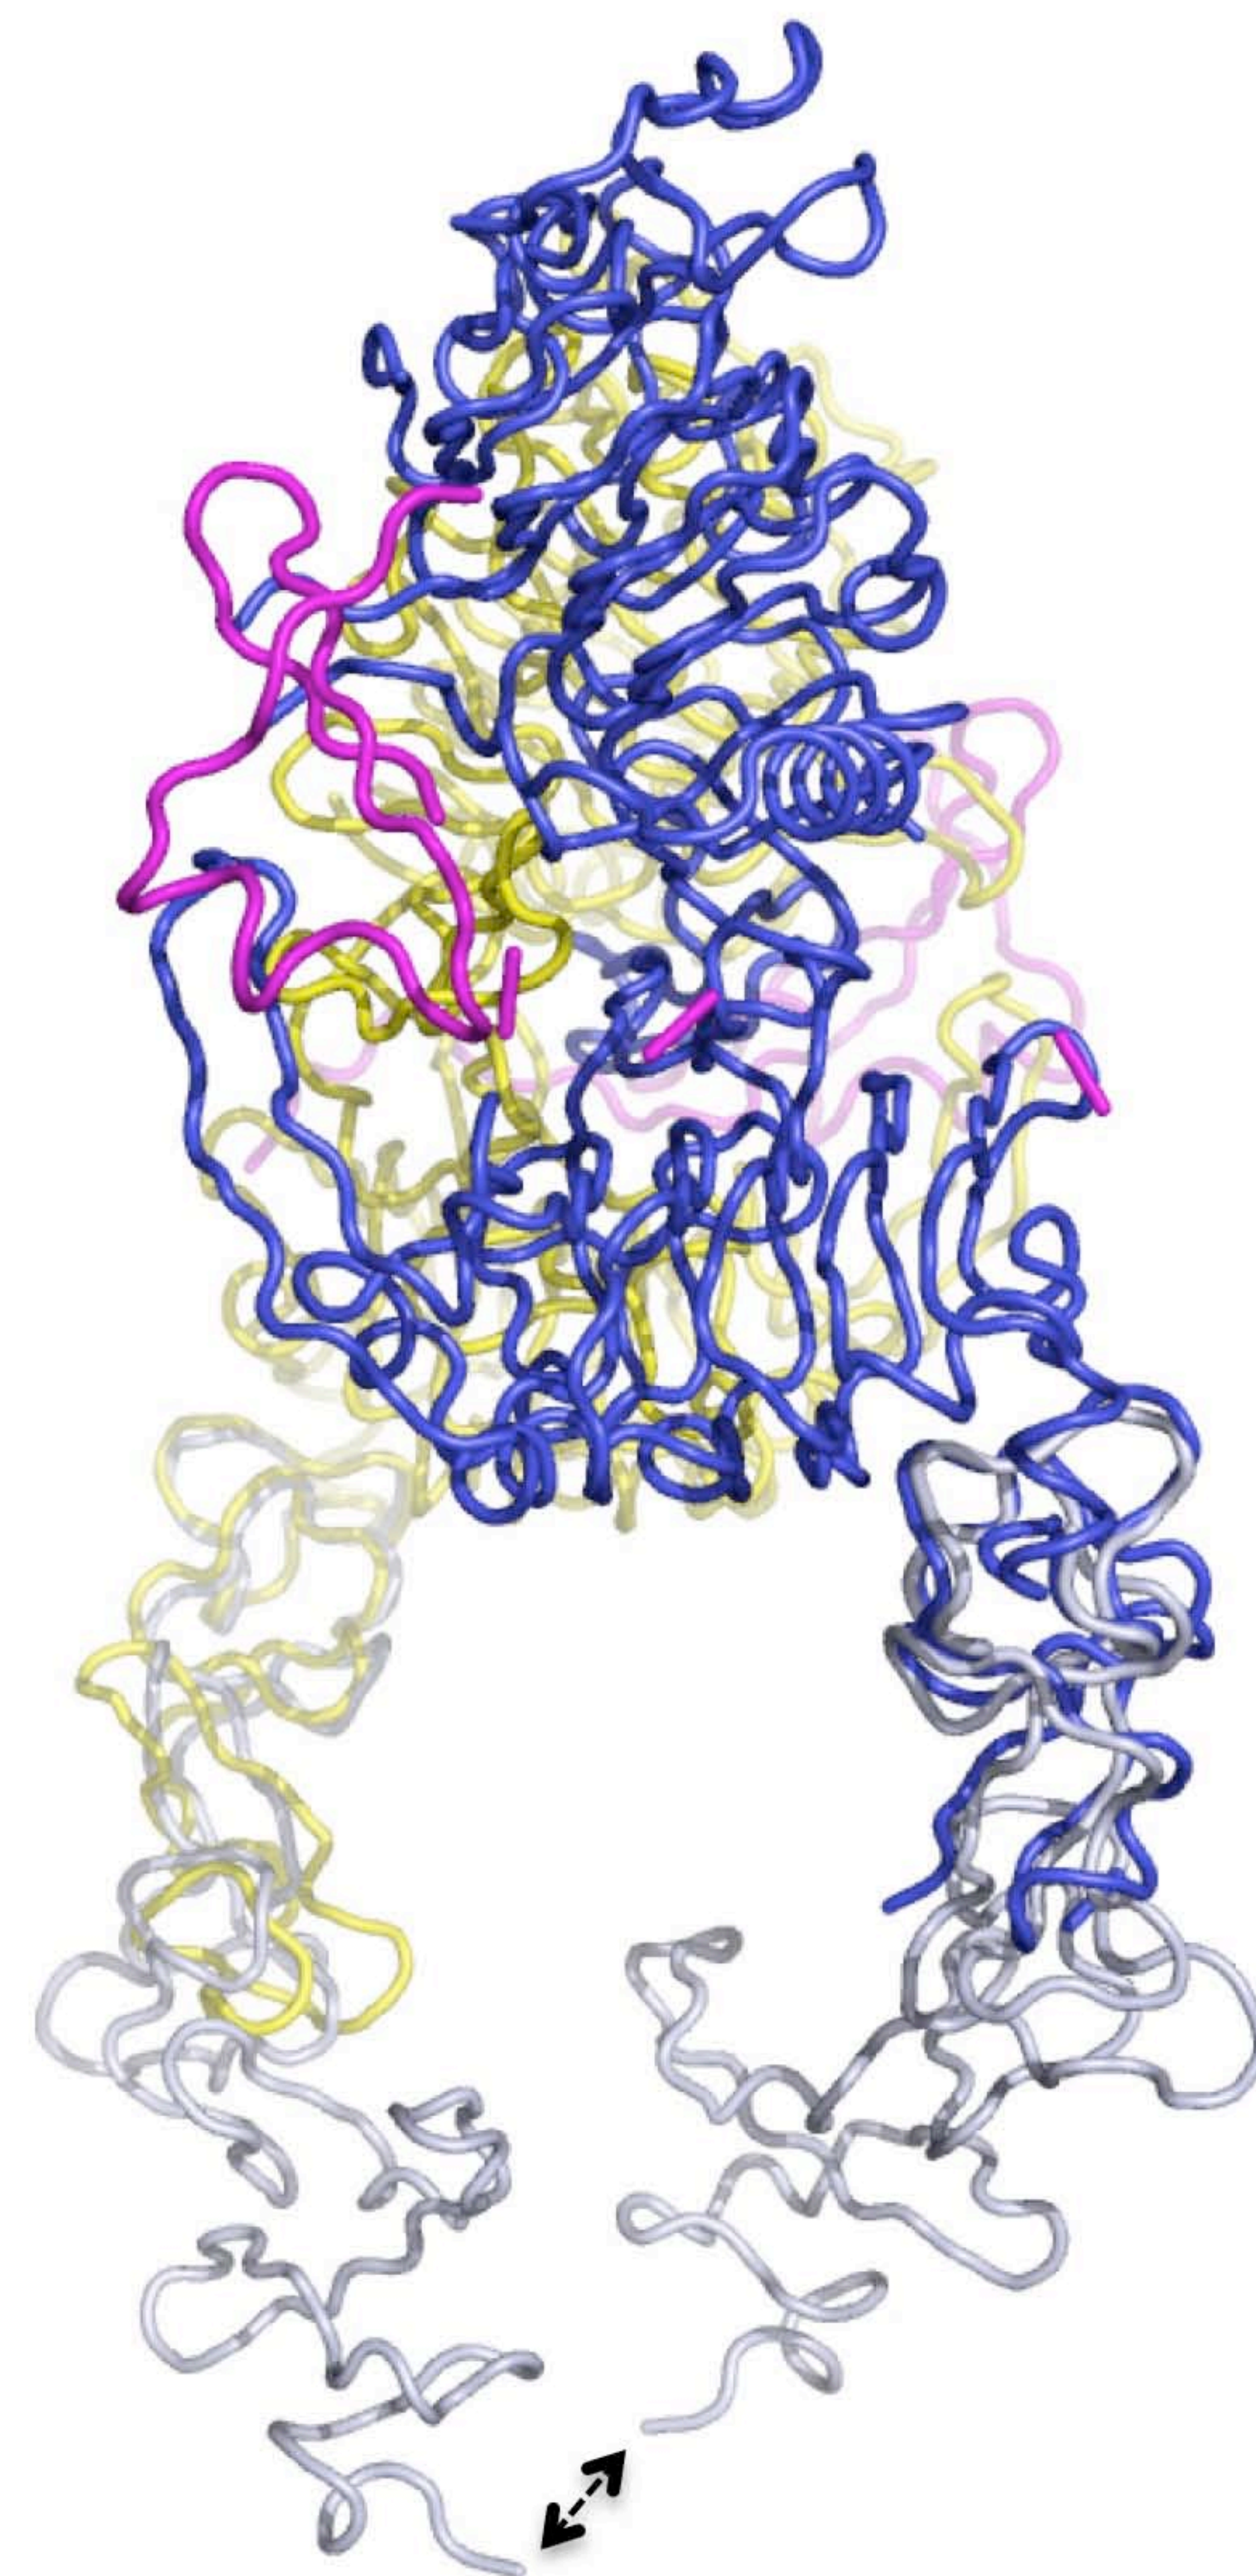

**12.8 Å**
